# Supplementary material
Source: PubMed Central journal article supplement (PMC7426646)

# Supplemental Materials

## Cereblon harnesses Myc-dependent bioenergetics and activity of CD8<sup>+</sup> T lymphocytes

<sup>1,2,\*</sup>Rebecca S. Hesterberg, <sup>1,\*</sup>Matthew S. Beatty, <sup>1,3,\*</sup>Ying Han, <sup>4</sup>Mario R. Fernandez, <sup>1,2</sup>Afua A. Akuffo, <sup>1</sup>William E. Goodheart, <sup>4</sup>Chunying Yang, <sup>1,2</sup> Shiun Chang, <sup>1</sup>Christelle M. Colin, <sup>1</sup>Aileen Y. Alontaga, <sup>1</sup>Jessica M. McDaniel, <sup>1</sup>Adam W. Mailloux, <sup>1,2</sup>Julia M. R. Billington, <sup>1,5</sup>Lanzhu Yue, <sup>2,6</sup>Shonagh Russell, <sup>6</sup>Robert J. Gillies, <sup>7</sup>Sang Y Yun, <sup>7#</sup>Muhammad Ayaz, <sup>8</sup>Nicholas J. Lawrence, <sup>7</sup>Harshani R. Lawrence, <sup>9</sup>Xue-Zhong Yu, <sup>9</sup>Jianing Fu, <sup>10</sup>Lancia N. Darville, <sup>10,11</sup>John M. Koomen, <sup>3</sup>Xiubao Ren, <sup>12</sup>Jane Messina, <sup>12</sup>Kun Jiang, <sup>13</sup>Timothy J. Garrett, <sup>14</sup>Anjali M. Rajadhyaksha, <sup>4</sup>John L. Cleveland, and <sup>1</sup>Pearlie K. Epling-Burnette

Departments of <sup>1</sup>Immunology, <sup>4</sup>Tumor Biology, <sup>6</sup>Cancer Physiology, <sup>8</sup>Drug Discovery, <sup>11</sup>Molecular Oncology, and <sup>12</sup>Anatomic Pathology and Cutaneous Oncology, Moffitt Cancer Center & Research Institute, Tampa, FL 33612, USA; <sup>2</sup>Cancer Biology PhD Program, University of South Florida, Tampa, FL 33620, USA; <sup>3</sup>Department of Immunology, Tianjin Cancer Institute and Hospital, Tianjin Medical University, Tianjin, PR China; <sup>5</sup>Department of Hematology, Tianjin Medical University General Hospital, 300052, China; <sup>7</sup>Chemical Biology Core, Moffitt Cancer Center & Research Institute, Tampa, FL, 33612, USA; <sup>9</sup>Department of Microbiology and Immunology, Medical University of South Carolina, Charleston, SC, 29425; <sup>10</sup>Proteomics and Metabolomics Core, Moffitt Cancer Center & Research Institute, Tampa, FL, 33612, USA; <sup>13</sup>Department of Pathology, Immunology and Laboratory Medicine, University of Florida, Gainesville, FL, 32610, USA; <sup>14</sup>Pediatric Neurology, Pediatrics, Weill Family Brain and Mind Research Institute; Graduate Program in Neuroscience, Weill Cornell Medical College, Cornell University, NY, 10065, USA

\*These authors contributed equally to this work

#Current address: Department of Chemistry Quaid-e-Azam University Islamabad, Pakistan

Correspondence: John L. Cleveland, Department of Tumor Biology, H. Lee Moffitt Cancer Center & Research Institute, Tampa, FL 33612. E-mail: John.Cleveland@moffitt.org

### List of Supplementary Materials

**Supplemental Materials and Methods**

**Supplemental Figures S1-S7**

**Supplemental Tables S1-S4**

**Supplemental References**

## Supplemental Materials and Methods

### Mouse husbandry and T cell culture

Germline *Crbn* heterozygous mice (*Crbn*<sup>+/-</sup>)<sup>1</sup> were obtained from Dr. Anjali Rajadhyaksha (Cornell University) for use in these experiments. Mice were genotyped according to established methods and genotypes were confirmed by genomic PCR and western blots, as shown previously.<sup>1</sup> OT1 transgenic mice<sup>2</sup> were bred to *Crbn*<sup>-/-</sup> mice for two generations to create OT1;*Crbn*<sup>-/-</sup> mice. C57Bl/6 and littermates of *Crbn*<sup>-/-</sup> mice were used as *Crbn*<sup>+/+</sup> controls. All genotyping primers are provided in supplemental Table 2. Stocks were maintained and bred at the H. Lee Moffitt Cancer Center and Research Institute under approved protocols by the Institutional Animal Care and Use Committee (IS00004986, IS00006088).

All T-cell experiments were conducted in RPMI supplemented with FBS, Penicillin, Streptomycin, Gentamicin, non-essential amino acids, sodium pyruvate and beta-mercaptoethanol.

### Mouse ELISA

For cytokine analyses, supernatants were harvested at 48 hr for IL-2 and IL-17 and at 72 hr for TNF $\alpha$ , IFN $\gamma$ , IL-10, and IL-4. Cytokines were quantified from standard curves by enzyme-linked immunosorbent assay (ELISA) according to the manufacturer's protocols (IL-2, Invitrogen; all others, R&D Systems).

### Human T-cell Experiments

T-cells were treated with 10 $\mu$ M lenalidomide, pomalidomide, avadomide or JQ1 for 5 days. For Seahorse assays, CD4<sup>+</sup> T-cells were removed by immunomagnetic selection prior to analysis.

### **Glucose uptake and flow cytometry analysis**

Antibodies (all from BD, Biolegend, Tonbo biosciences or Thermo Fisher) were added at 0.2  $\mu\text{g}$  per  $10^6$  cells in 100- $\mu\text{L}$  volume FACs buffer (PBS with 2 mM EDTA, 1% FBS and 1% BSA) for 20-30 min at 4°C. The OVA and Trp2 tetramers (MBL) was used for staining of OT1 and OT1;*Crbn*<sup>-/-</sup> splenocytes and B16 TIL by adding 1.5- $\mu\text{L}$  of the tetramer to  $10^6$  cells in 100- $\mu\text{L}$  FACs buffer for 20 min at room temperature prior to antibody staining. Viability was determined by staining cells with Zombie Near IR dye (Biolegend), Ghost Dye 780 (Tonbo Biosciences) or Live/Dead Yellow (BD) for fixed cells, or with 7AAD and DAPI for freshly isolated cells. Proliferation of *Crbn*<sup>+/+</sup> and *Crbn*<sup>-/-</sup> T-cells by dye dilution was determined by staining cells with 5-10  $\mu\text{M}$  CellTrace Violet (Thermo Fisher) for 10 min at 37°C in PBS prior to activation. Glucose uptake was analyzed by staining cells with 10  $\mu\text{M}$  2-(N-(7-Nitrobenz-2-oxa-1,3-diazol-4-yl)Amino)-2-Deoxyglucose (2-NBDG, Thermo Fisher) in PBS for 30-60 min at 37°C prior to antibody staining. MitoTracker fluorescence was analyzed by staining cells with 50 nM MitoTracker Green in PBS for 30 min at 37°C and membrane potential was analyzed by staining cells with 1nM TMRE for 30 minutes at 37°C and keeping cells in TMRE solution during flow analysis (Thermo Fisher). All data collection was performed on an LSR II or FACS Canto II (BD Biosciences) and analysis was performed on Flowjo software.

### **Metabolic analyses**

Seahorse metabolic assays were conducted using activated *Crbn*<sup>+/+</sup> and *Crbn*<sup>-/-</sup> CD8<sup>+</sup> T-cells or IM-treated human CD8<sup>+</sup> T-cells. Cells were plated in Seahorse base medium supplemented with 6 mM glucose and 1 mM glutamine at  $10^5$  T-cells per well in a 96-well Seahorse plate. Mitochondrial stress tests were used as per manufacturer's protocol. Extracellular acidification (ECAR) and oxygen consumption rates (OCR) were analyzed using Wave Software.

### **ATP, hexokinase enzymatic assay and NAD/NADH assays**

*Crbn*<sup>+/+</sup> and *Crbn*<sup>-/-</sup> CD8<sup>+</sup> T-cells were activated for 24 hr with anti-CD3 $\epsilon$  and anti-CD28 and levels of ATP (Perkin Elmer), NAD/NADH (Promega) and hexokinase activity (Abcam) were determined after another 48 hr of culture as per the manufacturer's protocols.

### **Arginine and Glutamine uptake assays**

Arginine and glutamine uptake assays were performed using *Crbn*<sup>+/+</sup> and *Crbn*<sup>-/-</sup> CD8<sup>+</sup> T-cells that were activated for 24 hr. 3x10<sup>6</sup> cells were suspended in 1x PBS with Ca<sup>2+</sup> and Mg<sup>2+</sup>/0.1% glucose and 0.2  $\mu$ Ci of the indicated amino acid was added and incubated at room temperature for 20 min. To stop the reaction, cells were spiked with 1x cold PBS. Cells were then washed twice with ice cold 1x PBS and subsequently lysed with 0.1% NaOH. The lysate was mixed with scintillation buffer and counts were determined with a TriCarb 2810 TR liquid scintillation analyzer (Perkin Elmer).

### **Quantitative PCR analysis**

Cells pellets were kept in RLT Buffer (for Qiagen kit use) and at -80°C until RNA isolation. RNA was isolated as following manufacturer's protocol (Qiagen or Machery-Nagel) and kept at -20°C until quantification. RNA was converted into cDNA as per manufacturer's protocol (Bio-Rad) and 1-2 ng were used to quantify the expression of the following genes: human and mouse *c-Myc*, *Ifng* and *Crbn* by Taqman (Thermo Fisher); *Gzmb*, *Pfr1*, *Tbx21*, *EOMES*, *Slc7a1*, *Slc38a1*, *Slc1a5*, *Odc1*, *Oat*, *Srm*, and *Sms* by Sybr Green (IDT Technologies); and *B2M* by Taqman and Sybr Green. Sybr green probe sequences are provided in supplemental Table 3.

### **Gene set testing and pathway analyses**

Unstimulated and 12 hr post-activated (5  $\mu$ g/mL anti-CD3, 1  $\mu$ g/mL anti-CD28, 24-well plate) T-cells from *Crbn*<sup>+/+</sup> and *Crbn*<sup>-/-</sup> mice were lysed and total RNA extracted using the iPrep Trizol Plus RNA kit. 100 ng of total RNA was amplified and labeled with biotin using the Ambion Message Amp Premier RNA Amplification Kit following the manufacturer's protocol initially described by Van Gelder et al.<sup>3</sup>

Hybridization with the biotin-labeled RNA, staining, and scanning of the chips on the GeneChip GCS3000 scanner followed the protocol outlined in the Affymetrix technical manual as described.<sup>4</sup> The oligonucleotide probe arrays used were the Mouse Genome 430 2.0 Array, which contain over 45,000 probe sets representing over 34,000 transcripts. The array output files were visually inspected for hybridization artifacts and then analyzed using Affymetrix Expression Console v 1.4 using the MAS 5.0 algorithm, scaling probe sets to an average intensity of 500. Pre-processing and normalization was then performed using Partek microarray data analysis software. Raw intensity files were processed using robust multi-array average (RMA). Principle Component Analysis (PCA) and unsupervised hierarchical clustering were performed. Statistical analysis was performed using two-way ANOVA. Gene lists with 2-fold differential expression and  $FDR \leq 0.05$  between the unstimulated and activated state in *Crbn*<sup>+/+</sup> and *Crbn*<sup>-/-</sup> T-cells were compared. Gene Ontology (GO) analysis was performed on genes differentially expressed only in *Crbn*<sup>-/-</sup> T-cells following activation using MetaCore by GeneGo. The microarray data have been deposited to the Gene Expression Omnibus database under accession number GSE81725.

### **Transmission electron microscopy**

Pellets from unstimulated and 24 hr stimulated T-cells were fixed immediately in cacodylate buffer (pH 7.4-7.5) with 2% glutaraldehyde overnight, and resuspended in 1% osmium tetroxide. Samples were dehydrated step-wise (50%, 70%, 95%, 100%) in increasing concentrations of alcohol followed by step-wise (2:1, 1:1, 1:2, 0:1 alcohol to resin) infiltration of resin. Resin blocks were cut on a microtome and images acquired on a JEOL 1400 transmission electron microscope. Mitochondria number and average mitochondrial length was determined by visually using Adobe Photoshop.

### **Western blot analyses**

Cells were lysed in RIPA lysis buffer supplemented with protease (Roche Pharmaceuticals) and phosphatase (Sigma-Aldrich) inhibitors. 30-40  $\mu$ g protein was separated by SDS-PAGE on 4-12%

gradient Bis-Tris gels using Novex Protein Separation System (Thermo Fisher Scientific). Antibodies were purchased from Cell Signaling Technology, Sigma Aldrich or gifted from Celgene. Densitometry was performed on 600 dpi greyscale images using ImageJ software (<http://imagej.nih.gov/ij/ds>) and values were normalized to  $\beta$ -Actin.

### **Homeostatic T-cell proliferation**

CD45.1 mice were sublethally irradiated at 600rad and  $2 \times 10^5$  CellTrace Violet-labeled *Crbn*<sup>+/+</sup> and *Crbn*<sup>-/-</sup> T-cells were injected via tail vein. Average number of divisions (division index) and memory populations were analyzed among spleen populations on day 7 after adoptive cell transfer.

### **Statistical analyses**

Statistical analyses for global metabolic profiling were performed separately on the positive and negative ion data, including both previously identified and unknown metabolites. Data integrity, missing data estimation, and data filtering were first performed on the data set. Normalization of the samples to allow adjustment of differences among the samples was performed using normalization by sum (*i.e.*, the total ion signal). Log transformation and autoscaling were selected. Univariate analysis by ANOVA was performed. Chemometric analysis including PCA and Partial Least Squares-Discriminant Analysis (PLS-DA) were conducted. Metaboanalyst 3.0<sup>6</sup> was used for statistical analysis using unpaired peak intensity tables in column format exported from MZmine.

For general statistical analyses, p-values were determined using GraphPad Prism Software (GraphPad Software) by Student's t test, Mantel-Cox Log-rank test, or two-way ANOVA as indicated in the figure legends. Equal variance was assumed between groups. All data are represented as mean with error bars representing  $\pm$  standard error. Number of animals in each group is listed in the figure legends for experiments entailing biological replicates. Technical replicate experiments are representative of 2-3 independent experiments and contain 3-6 replicates. Group sizes were based on prior experience with similar studies.

## **General compound synthesis and verification**

All reagents were purchased from commercial suppliers and used without further purification. Melting points were determined using an Optimelt automated melting point system (Stanford Research Systems) and remain uncorrected. Proton NMR spectra were recorded on an Agilent-Varian Mercury 400 MHz spectrometer or Bruker AVANCE III™ HD 500 MHz spectrometer with CDCl<sub>3</sub> or DMSO-*d*<sub>6</sub> as the solvent. Carbon (<sup>13</sup>C) NMR spectra were recorded at 100 MHz or 126 MHz. All coupling constants were measured in Hertz (Hz) and the chemical shifts ( $\delta_{\text{H}}$  and  $\delta_{\text{C}}$ ) were quoted in parts per million (ppm) relative to TMS ( $\delta$  0). Formula guided High Resolution Mass Spectroscopy (HRMS) was carried out on an Agilent G6230BA single Quad and TOF LC/MS system using a Zorbax SB-C18 rapid resolution column (2.1 × 30 mm, 3.5  $\mu\text{m}$ ). High Performance Liquid Chromatography and Mass Spectroscopy (HPLC-MS) were recorded on Agilent 6120 quadrupole 1220 Infinity LC/MS using a ZORBAX SB-C18 column (4.6×50 mm, 1.8  $\mu\text{m}$ ). HPLC analysis was performed using a JASCO HPLC system equipped with a PU-2089 Plus quaternary gradient pump and a UV-2075 Plus UV-VIS detector, using an Alltech Kromasil C-18 column (150 × 4.6 mm, 5  $\mu\text{m}$ ) and Agilent Eclipse XDB-C18 (150 × 4.6 mm, 5  $\mu\text{m}$ ). Thin layer chromatography was performed using silica gel 60 F254 plates (Fisher), with observation under UV when necessary. SiO<sub>2</sub> chromatography was carried out using a Biotage Isolera purification system. Anhydrous solvents (acetonitrile, dimethylformamide, ethanol, isopropanol, methanol and tetrahydrofuran) were used as purchased from Aldrich. Burdick and Jackson HPLC grade solvents (methanol, acetonitrile and water) were purchased from VWR for HPLC and high resolution mass analysis. HPLC grade TFA was purchased from Fisher. Detailed synthesis of compounds is provided in supplemental information.

## **Chemical Synthesis**

### ***Synthesis of CC-122***

**2-Methyl-5-nitro-4H-benzo[d][1,3]oxazin-4-one (2).**<sup>7</sup> In a microwave reaction vial (10 mL), 2-amino-6-nitrobenzoic acid (500 mg, 2.75 mmol) and acetic anhydride (5 mL) were heated in a Biotage Initiator microwave reactor at 200°C for 30 min. After cooling, the excess acetic anhydride was evaporated to provide a dark brown solid (~550 mg) which was dissolved in EtOAc (~5 mL). Upon addition of hexane (~10 mL) and sonication, a light brown solid precipitated. The suspension was kept at 4°C for 1 hr and filtered. The residue was washed with hexane (~20 mL) and air dried to provide the title compound **2** as a beige solid (402 mg, 71%). Mp: 147-149°C, (lit. Mp: 155-156°C).<sup>8</sup> A second reaction using 2-amino-6-nitrobenzoic acid (1 g) in the same way furnished **2** in 89% yield. <sup>1</sup>H NMR (500 MHz, DMSO-*d*<sub>6</sub>): δ 8.06 (t, *J* = 8.0 Hz, 1H), 7.93 (dd, *J* = 8.0, 1.5 Hz, 1H), 7.79 (dd, *J* = 8.0, 1.1 Hz, 1H), 2.42 (s, 3H).

**3-(2-Methyl-5-nitro-4-oxoquinazolin-3(4H)-yl)piperidine-2,6-dione (3).**<sup>9</sup> 3-Aminopiperidine-2,6-dione hydrochloride (196.3 mg, 1.19 mmol) and **2** (300 mg, 1.46 mmol) were dissolved in anhydrous pyridine (5 mL) in a microwave vial (10 mL). The vial was sealed and heated at 140°C (oil bath temperature) for 18 hr. After the reaction was complete (as monitored by TLC), the majority of the pyridine was evaporated and azeotropically removed with MeOH using a rotary evaporator. The resulting thick blackish residue was purified using SiO<sub>2</sub> chromatography eluting with a gradient of DCM-MeOH (0 to 20% MeOH). The title compound **3** was obtained as a light brown solid (86 mg, 23%). Mp: 284°C (dec). <sup>1</sup>H NMR (500 MHz, DMSO-*d*<sub>6</sub>): δ 11.06 (s, 1H), 7.98 (t, *J* = 8.0 Hz, 1H), 7.87 (dd, *J* = 8.5, 1.0 Hz, 1H), 7.81 (dd, *J* = 8.0, 1.1 Hz, 1H), 5.34 (dd, *J* = 12.0, 5.5 Hz, 1H), 2.82 (ddd, *J* = 17.8, 13.2, 3.3 Hz, 1H), 2.68 (s, 3H), 2.63–2.53 (m, 2H), 2.24–2.12 (m, 1H); HPLC–MS (ESI+): *m/z* 317.2 (M+H)<sup>+</sup>.

**3-(5-Amino-2-methyl-4-oxoquinazolin-3(4H)-yl)piperidine-2,6-dione (CC-122).**<sup>9</sup> A three-neck round bottom flask containing Pd(OH)<sub>2</sub> (20% on carbon, 77.8 mg, 0.10 equiv.) was evacuated and flushed with argon. Dry DMF (20 mL) was added and argon gas was purged through the mixture for ~10 min. The argon line was replaced with a hydrogen balloon, and **3** (350 mg, 1.11 mmol) dissolved



in DMF (3 mL) was added *via* a syringe. The reaction was stirred at room temperature under a hydrogen atmosphere for 18 hr. After confirming the reaction was complete (as monitored by TLC and HPLC-MS) the mixture was passed through a pad of celite. The filtrate was concentrated and purified by SiO<sub>2</sub> chromatography eluting with a gradient of DCM-MeOH (0 to 15% MeOH) to provide the title compound as a beige solid (162 mg, 51%). Mp: 264°C (dec), (lit. Mp: 295-297°C)<sup>2</sup>. HPLC: 97% [*t*<sub>R</sub> = 11.9 min, gradient MeOH-water (with 0.1% TFA), 5-95% over 30 min.]; <sup>1</sup>H NMR (400 MHz, DMSO-*d*<sub>6</sub>): δ 10.99 (s, 1H), 7.36 (t, *J* = 8.0 Hz, 1H), 7.03 (brs, 2H), 6.58 (dd, *J* = 8.0, 1.0 Hz, 1H), 6.55 (dd, *J* = 8.0, 1.2 Hz, 1H), 5.15 (dd, *J* = 11.4, 5.7 Hz, 1H), 2.90–2.75 (m, 1H), 2.68–2.57 (m, 2H), 2.53 (s, 3H), 2.18–2.08 (m, 1H); <sup>13</sup>C NMR (126 MHz, DMSO-*d*<sub>6</sub>): δ 173.61, 169.70, 162.64, 153.66, 150.59, 148.22, 134.96, 111.42, 110.53, 104.20, 55.96, 30.57, 23.20, 21.04; HPLC-MS (ESI+): *m/z* 287.2 (M+H)<sup>+</sup>. HRMS (ESI+): *m/z* calcd for C<sub>14</sub>H<sub>15</sub>N<sub>4</sub>O<sub>3</sub> (M+H)<sup>+</sup> 287.1139, found 287.1141.

### **Preparation of MYCMI-6**

**(E)-3-((9-Amino-7-ethoxyacridin-3-yl)diazenyl)pyridine-2,6-diamine:** The diazonium salt of ethacridine lactate was prepared according to the reported procedure.<sup>10</sup> A 100 mL round bottom flask was charged with ethacridine lactate monohydrate (0.36 g, 1 mmol), H<sub>2</sub>O (50 mL) and hydrochloric acid (1.5 mL, 3N aq.). The mixture was cooled to 0°C and a solution of NaNO<sub>2</sub> [0.1 g, 1.45 mmol, in H<sub>2</sub>O (5 mL)] was added. Tetrafluoroboric acid (10 mL, 35% in H<sub>2</sub>O) was subsequently added to the mixture, and stirring continued for 10 min at 0°C. The mixture was filtered. The red solid obtained was washed with cold H<sub>2</sub>O, ethanol and Et<sub>2</sub>O to give **SY4-046** (0.2 g, 57%). This material was used, without further purification, in the next reaction, according to a general method for coupling diazonium salts with 2,6-diaminopyridine.<sup>11</sup> First, 2,6-diaminopyridine (70 mg, 0.64 mmol) was dissolved in hydrochloric acid (1.0 mL, 2N aq.) and cooled to 0°C. The diazonium salt **SY4-046** (0.2 g, 0.57 mmol) was added and the mixture was stirred for 10 min. Sodium acetate (solid) was added to adjust pH (between 5 – 6) and the mixture was stirred for a further 2 min. The crude mixture was filtered and the red solid obtained was transferred to a 50 mL round bottom flask, saturated

NaHCO<sub>3</sub> solution (25 mL) was added and stirred for 20 min. The resulting mixture was filtered and the red solid was washed with cold H<sub>2</sub>O and ethanol. The red solid was dried under vacuum to afford **SY4-047** (130 mg, 62%). HPLC: 99.7% [*t<sub>R</sub>* = 14.03 min, gradient MeOH 5–95% in water (with 0.1% TFA), 20 min, 254 nm]. <sup>1</sup>H NMR (500 MHz, DMSO-*d*<sub>6</sub>) *J* = 9.5 Hz, 1H), 7.98 (d, *J* = 2.0 Hz, 1H), 7.81 (d, *J* = 9.0 Hz, 1H), 7.75 (t, *J* = 9.5 Hz, 2H), 7.65 (d, *J* = 2.0 Hz, 1H), 7.47 (s, 2H), 7.35 (dd, *J* = 9.5, 2.5 Hz, 1H), 6.77 (s, 2H), 6.02 (d, *J* = 9.0 Hz, 1H), 4.22 (q, *J* = 7.0 Hz, 2H), 1.45 (t, *J* = 7.0 Hz, 3H). <sup>13</sup>C NMR (125 MHz, DMSO-*d*<sub>6</sub>) *m/z* 374.2 (M+H)<sup>+</sup>. HRMS (ESI<sup>+</sup>): *m/z* calcd for C<sub>20</sub>H<sub>20</sub>N<sub>7</sub>O (M+H)<sup>+</sup> 374.1724, found 374.1717.

The purity of the following compounds was determined as > 95% by HPLC-MS.

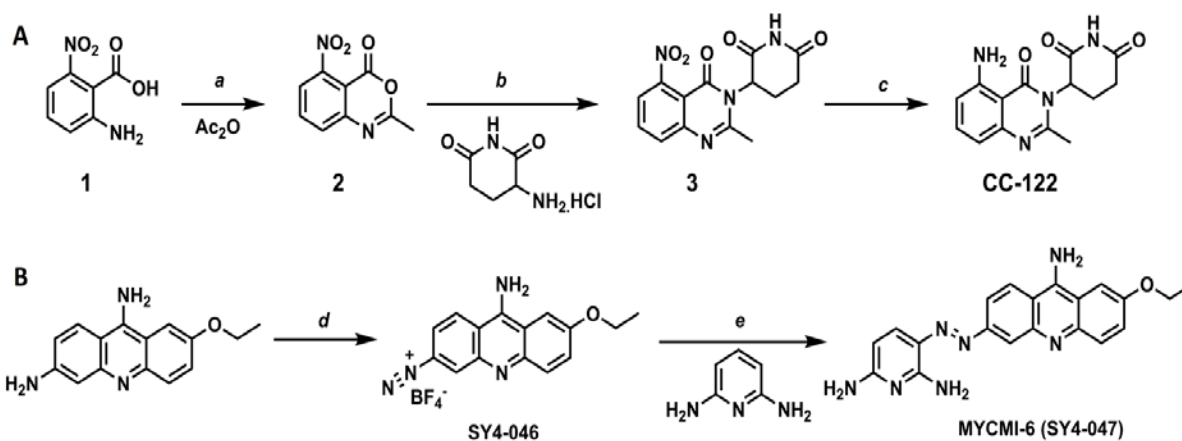

**Synthesis of CC-122.** *Reagents and conditions.* (a) 200 °C, 30 min, 85%; (b) Pyridine, 140 °C, 18 h, 23%; (c) Pd(OH)<sub>2</sub>, H<sub>2</sub> (balloon), DMF, rt, 12 h, 51%.

**Synthesis of MYCMI-6.** *Reagents and conditions.* (d) NaNO<sub>2</sub>, HCl, 0 °C; 2. HBF<sub>4</sub>; (e) 1. 2N HCl; 2. NaOAc.

**Lenalidomide** (purchased from LC Laboratories); HPLC-MS (ESI<sup>+</sup>): *m/z* 260 (M+H)<sup>+</sup>.

**Pomalidomide** (purchased from Ark Pharm, Inc.); HPLC-MS (ESI<sup>+</sup>): *m/z* 274 (M+H)<sup>+</sup>.

**Thalidomide** (purchased from Sigma-Aldrich); HPLC-MS (ESI<sup>+</sup>): *m/z* 259 (M+H)<sup>+</sup>.

**JQ-1**; HPLC-MS (ESI+):  $m/z$  457 (M+H)<sup>+</sup>.

**10074-G5**; HPLC-MS (ESI+):  $m/z$  355 (M+Na)<sup>+</sup>.

## **Quantitation of polyamines and global profiling by LC/MS**

### ***Polyamine extraction, LC/MS and quantitation***

*Extraction.* Cell pellets (1 x 10<sup>6</sup> T-cells per replicate, n = 3) were spiked with 5  $\mu$ L of internal standard solution containing 1  $\mu$ g/mL of <sup>13</sup>C<sub>4</sub>-putrescine, <sup>13</sup>C<sub>5</sub>-ornithine, 1,1,2,2,3,3,4,4-D<sub>8</sub>-N-(3-Aminopropyl) Butane-1,4-Diamine:3HCl (D<sub>8</sub>-spermidine), and 1,1,2,2,3,3,4,4-D<sub>8</sub>-N,N'-Bis(3-Aminopropyl)-1,4-Butanediamine:4HCl (D<sub>8</sub>-spermine). An aliquot (200- $\mu$ L) of HPLC grade methanol heated to 80°C was added to each sample, vortexed and incubated for 5 min at 80°C. Samples were centrifuged at 16,200 x  $g$  for 15 min at 4°C. The extraction process was repeated using 100- $\mu$ L of hot methanol at 80°C. The supernatants containing metabolites from both extractions were pooled and dried in a vacuum centrifuge (Savant SC210A, ThermoFisher Scientific). Samples were resuspended in 50- $\mu$ L of HPLC grade water.

*Liquid Chromatography-Selected Ion Monitoring.* Metabolomics was performed on an ultra-performance liquid chromatography (UPLC model U3000, Dionex) interfaced with an electrospray Q Exactive HF mass spectrometer (ThermoFisher Scientific) using full MS and selected ion monitoring (LC-SIM) for quantification of each target. The following solvent system is used: solvent A is 100% HPLC grade water (Burdick & Jackson, Honeywell) containing 0.05% Heptafluorobutyric acid, and solvent B is aqueous 90% acetonitrile with 0.1% formic acid. For each sample, a 10- $\mu$ L aliquot of the metabolite mixture was loaded onto an Accucore reverse phase C18 column (27826-153030, 2.1 mm x 100 mm, 2.6  $\mu$ m particle size, ThermoFisher Scientific). A gradient of 20% B to 80% B was applied over 6 min with a flow rate of 0.350 mL/min followed by re-equilibration over 3 min, for a total of 9 min for the LC experiment. Mass spectrometry instrument parameters for SIM on the Q Exactive HF included the following: resolution 70,000; isolation window width 1.0  $m/z$  and isolation offset 0.2

$m/z$ ; AGC target  $2e5$ ; maximum IT 100 ms; an inclusion list containing the  $m/z$  for each metabolite, its respective stable isotope standard (SIS) and a scheduled time window for metabolite elution.

*Data Analysis for Metabolite Quantification.* Xcalibur Quan Browser (version 3.0.63, ThermoFisher Scientific, San Jose, CA) was used for data analysis. Metabolite amounts (pmol) were calculated using the peak area ratio of each molecule to its respective.

### **Global metabolomic profiling**

*Sample preparation.* Samples were thawed on ice then centrifuged at  $20,000 \times g$  for 5 minutes at  $4^{\circ}\text{C}$  to pellet the cells. Supernatants were discarded and the pellets were washed with 1 mL of 40 mM ammonium formate. The samples were mixed on a vortex and then centrifuged at  $20,000 \times g$  for 5 minutes at  $4^{\circ}\text{C}$  and supernatants were discarded. The wash step was performed 2 more times. To each sample, 50  $\mu\text{L}$  of 5 mM ammonium acetate and 10-20 pieces of 0.7 mm zirconia beads were added. Homogenization was done on a Bead Beater (BioSpec, Bartlesville, OK) at 1800 rpm for 30 sec. Samples were incubated at  $4^{\circ}\text{C}$  for 30 min. Protein concentrations were determined using Qubit Protein Assay kit. Prior to extraction, samples were normalized to 300  $\mu\text{g}/\text{mL}$  or to the lowest protein concentration by diluting to 50  $\mu\text{L}$  with 5 mM ammonium acetate. Each sample received 10  $\mu\text{L}$  of internal standards solution, containing creatine-D3 H<sub>2</sub>O, L-Leucine-D10, L-tryptophan-2,3,3-D3, Citric acid 13C6, L-tyrosine Ring 13C6, L-tryptophan 13C11, L-leucine 13C6, L-phenylalanine Ring-13C6, N-BOC-L-tert-leucine, and N-BOC-L-aspartic acid. Samples were extracted by protein precipitation using 1 mL ice-cold 80% methanol/20% water and mixed on the Bead Beater (BioSpec Products) at 1,800 rpm for 30 sec. Further protein precipitation was allowed by incubating the samples at  $4^{\circ}\text{C}$  for 30 min. Samples were centrifuged at  $20,000 \times g$  for 5 min at  $4^{\circ}\text{C}$  to pellet the protein. An aliquot of the supernatant (1 mL) was transferred from each sample into clean tube and dried under a gentle stream of nitrogen at  $30^{\circ}\text{C}$ . Dried extracts were re-suspended with 30  $\mu\text{L}$  reconstitution solution consisting of injection standards in 0.1% formic acid in water containing 6

$\mu\text{g/mL}$  of Boc-L-tyrosine, Boc-L-tryptophan, and Boc-D-phenylalanine. Resuspension was allowed at  $4^{\circ}\text{C}$  for 10 -15 minutes; then, samples were centrifuged at  $20,000 \times g$  for 5 minutes at  $4^{\circ}\text{C}$ . Supernatants were collected into clean LC-vials for LC-MS metabolomics analysis.

*LC-MS Global metabolomics.* Profiling was performed on a Thermo Q-Exactive Orbitrap mass spectrometer with Dionex UHPLC and autosampler. All samples were analyzed with positive and negative heated electrospray ionization with a mass resolution of 35,000 at  $m/z$  200 as separate injections. Sheath gas and auxiliary gas flow rates were set at 50 and 10, respectively, with auxiliary gas temperature of  $350^{\circ}\text{C}$ . Spray voltage was set to 3.0 kV and capillary temperature to  $325^{\circ}\text{C}$ . Mass range was from  $m/z$  70 to 1000 with MS acquisition for 17.5 min. Separation was achieved on an ACE 18-PFP  $100 \times 2.1$  mm,  $2 \mu\text{m}$  column (MAC-MOD Analytical, Chadds Ford, PA) with mobile phase A as 0.1% formic acid in water and mobile phase B as acetonitrile. The flow rate was  $350 \mu\text{L}/\text{min}$  with a column temperature of  $25^{\circ}\text{C}$ . Total LC run time was 20.5 min. The initial condition of 100% A at  $0.35 \text{ mL}/\text{min}$  was held for 3 min then a linear gradient from 0-80% B for 10 min. To wash the column, 80% B was held for 3 min before going back to 0% B. For each sample,  $4 \mu\text{L}$  was injected for negative ion analysis and  $2 \mu\text{L}$  for positive ions.

*Data processing.* Data from positive and negative ion modes were processed separately. LC-MS files were first converted to open-format files (i.e. MzXML) using MSConvert (Proteowizard 3.0.10095). MZmine 2.23 was used to identify features, deisotope peaks, align features and perform gap filling to fill in any features that may have been missed in the first alignment algorithm.<sup>12</sup> All adducts and complexes were identified and removed from the data set prior to statistical analysis.

Statistical analyses were performed separately on the positive and negative ion data including both previously identified and unknown metabolites. Metaboanalyst 3.0<sup>6</sup> was used for statistical analysis using unpaired peak intensity tables in column format exported from MZmine. Data integrity, missing data estimation, and data filtering were first performed on the data set. Normalization of the samples to allow adjustment of differences among the samples was performed

using normalization by sum (*i.e.*, total ion signal). Log transformation and autoscaling were selected. Univariate analysis by ANOVA was performed. Chemometric analysis including Principal Component Analysis (PCA) and Partial Least Squares-Discriminant Analysis (PLS-DA) were conducted. Unsupervised clustering with visualization in a heat map was also done on the data set. Statistical analysis is provided in the main manuscript.

### **B16-OVA cytotoxicity assay**

B16-OVA target cells (gift from Dr. S Pilon-Thomas, Moffitt Cancer Center) were treated with 10ng/mL of IFN $\gamma$  for 2 hours at 37°C and re-plated in a flat-bottom 96-well plate. Activated OT1 and OT1;*Crbn*<sup>-/-</sup> were then added at a 5:1 T cell to target ratio for 6 hr. LDH release in the media as per manufacturer's protocol and percent of target cells lysed was determined by the following equation:

$$\frac{\text{Experimental LDH} - \text{T cell spontaneous LDH} - \text{B16OVA spontaneous LDH}}{\text{B16OVA total LDH} - \text{B16OVA spontaneous LDH}} \times 100$$

### **CRBN CRISPR/Cas9 editing**

Guide crRNA's targeting 2 locations of CRBN (AACTACTCCGGGCGGTTACC and CAGGACGCTGCGCACAACAT) were manufactured on Integrated DNA Technologies's Alt-R platform. Negative crRNA guides that do not target the human genome were also purchased through IDT. Lyophilized guides were resuspended at 100 $\mu$ M in IDT duplex buffer. Guide crRNA's were then duplexed with tracrRNA (IDT) in equimolar ratio at 95°C for 5 min before gradual cooling to room temperature. Complexed guide RNA's were then incubated for 15 min at room temperature with purified CAS9 protein (Invitrogen TrueCut CAS9 v2, Cat# A36499 ) at a ratio of 3:1 (Guide RNA : CAS9) by adding 3 $\mu$ L of guide RNA to 2 $\mu$ L of CAS9 protein. Following incubation, complexed RNP (Guide RNA + CAS9) was mixed with 4 x 10<sup>6</sup> CD8<sup>+</sup> T-cells that had been resuspended in 15 $\mu$ L Lonza P2 Primary cell solution (Lonza, Cat# PBP2-00675). RNP cell mixture was then transferred into the provided nucleocuvette

strip and nucleoporated on a Lonza Amaxa 4-D-Nucleofector using pulse code EH100. Following nucleoporation, cells were immediately transferred to warm media and rested for 48 hr for downstream assays

## Supplemental Figure Legends

**Supplemental Figure 1.** (A) CRBN protein levels are dynamically regulated in human T-cells following stimulation with anti-CD3 and anti-CD28. Actin served as a loading control. (B) Unsupervised clustering of transcripts from unstimulated and 12 hr anti-CD3 $\epsilon$ /anti-CD28 activated *Crbn*<sup>+/+</sup> and *Crbn*<sup>-/-</sup> purified T-cells (unstim *Crbn*<sup>+/+</sup>, n=3; unstim *Crbn*<sup>-/-</sup>, n=2; activated *Crbn*<sup>+/+</sup>, n=3; and activated *Crbn*<sup>-/-</sup>, n=3). (C) *Crbn* protein levels in T-cells (D) and *Crbn* mRNA levels in the indicated mouse immune tissues or immune cell subsets derived from spleens of *Crbn*<sup>+/+</sup> (+) or *Crbn*<sup>-/-</sup> (-) mice, normalized to mRNA encoding Tata binding protein (*TBP*). (E) Percent CD4<sup>+</sup> and CD8<sup>+</sup> T-cells among total CD3<sup>+</sup> splenocytes in 3 month old *Crbn*<sup>+/+</sup> and *Crbn*<sup>-/-</sup> mice. (F) CD44 expression on CD8<sup>+</sup> and CD4<sup>+</sup> T-cells in aging *Crbn*<sup>+/+</sup> and *Crbn*<sup>-/-</sup> mice. (G) Levels of TNF $\alpha$ , IL-17, IL-10 and IL-4 in activated pan T-cells from *Crbn*<sup>+/+</sup> and *Crbn*<sup>-/-</sup> mice. (H) Western blot analysis of Ikaros, CK1 $\alpha$ , IRF-4, and  $\beta$ -actin in unstimulated and anti-CD3 $\epsilon$ /anti-CD28 activated *Crbn*<sup>+/+</sup> and *Crbn*<sup>-/-</sup> T-cells. (I) mRNA levels of *IKZF1* in *Crbn*<sup>+/+</sup> and *Crbn*<sup>-/-</sup> T-cells and of (J) *Prf1* in *Crbn*<sup>+/+</sup> and *Crbn*<sup>-/-</sup> CD8<sup>+</sup> T-cells, following activation with anti-CD3 $\epsilon$ /anti-CD28. n.s.=not significant, \*p<0.05, \*\*p<0.01, \*\*\*p<0.001, \*\*\*\*p<0.0001.

**Supplemental Figure 2.** Results of Agilent Seahorse XF Cell Mito Stress Test to measure (*left*) extracellular acidification rates (ECAR) and (*right*) oxygen consumption rates (OCR) in 24 hr anti-CD3 $\epsilon$  or anti-CD3 $\epsilon$  + anti-CD28-treated *Crbn*<sup>+/+</sup> and *Crbn*<sup>-/-</sup> CD8<sup>+</sup> T-cells. Lines indicate addition of oligomycin to inhibit ATPase (Complex V), carbonyl cyanide-4 (trifluoromethoxy) phenylhydrazone (FCCP) to uncouple the electron transport chain for calculation of Spare Respiratory Capacity (SRC), and rotenone/antimycin to inhibit Complex I and Complex II, respectively.

**Supplemental Figure 3.** (A-B) Metabolomics analysis of CD8<sup>+</sup> *Crbn*<sup>+/+</sup> and *Crbn*<sup>-/-</sup> T-cells 24 hr after anti-CD3 $\epsilon$  + anti-CD28 activation. (A) Pathway analysis of metabolite abundance highlighting



statistical information for the arginine and proline metabolism pathways. (B) Principle component analysis of metabolites measured in positive mode (*left*) and negative mode (*right*). (C) Structure of the polyamines putrescine, spermidine, and spermine. (D-E) qRT-PCR analysis of the expression of the indicated amino acid transporters and enzymes that direct (D) glutamine and arginine catabolism and (E) polyamine synthesis in *Crbn*<sup>+/+</sup> and *Crbn*<sup>-/-</sup> T-cells without activation or following 24 hr stimulation with anti-CD3 $\epsilon$  and anti-CD28 (fold change are provided in Figure 3B). (F) Spare respiratory capacity (SRC) of 24 hr activated *Crbn*<sup>+/+</sup> and *Crbn*<sup>-/-</sup> CD8<sup>+</sup> T-cells. (G) Mitotracker Green staining of naïve and 24- and 72-hr activated *Crbn*<sup>+/+</sup> and *Crbn*<sup>-/-</sup> CD8<sup>+</sup> T-cells. (H) Mitochondrial membrane potential of 24-hr activated *Crbn*<sup>+/+</sup> and *Crbn*<sup>-/-</sup> CD8<sup>+</sup> T-cells. (I-K) Transmission electron microscopy of *Crbn*<sup>+/+</sup> and *Crbn*<sup>-/-</sup> CD8<sup>+</sup> T-cells 24 hr after activation (I); number of mitochondria (J); and (K) average mitochondrial length. (L) Intracellular ROS (*left*) and mitochondrial ROS (*right*) levels in *Crbn*<sup>+/+</sup> and *Crbn*<sup>-/-</sup> CD8<sup>+</sup> T-cells 24 hr after activation. n.s.=not significant, \*p<0.05, \*\*p<0.01, \*\*\*p<0.001, \*\*\*\*p<0.0001.

**Supplemental Figure 4.** (A) Top 10 up-regulated transcription factor drivers identified by GSEA altered in activated *Crbn*<sup>-/-</sup> T-cells (from data in Figure 2D) indicate pathway enrichment for Myc:Max and Myc. (B) Cell size of anti-CD3/anti-CD28 activated *Crbn*<sup>+/+</sup> and *Crbn*<sup>-/-</sup> CD8<sup>+</sup> T-cells. (C-D) qRT-PCR analysis of the effects of co-treatment with the indicated Myc:Max dimerization inhibitors on the expression of the indicated Myc target genes *Slc38a1*, *Slc1a5*, *Srm*, and *Sms*, and (D) on the expression of the indicated T<sub>E</sub> genes, including *Tbx21*, *Eomes*, *Gzmb* and *Ifng*, in anti-CD3/anti-CD28 activated *Crbn*<sup>+/+</sup> and *Crbn*<sup>-/-</sup> CD8<sup>+</sup> T-cells. n.s.=not significant, \*\*p<0.01, \*\*\*p<0.001, \*\*\*\*p<0.0001.

**Supplemental Figure 5.** (A) The percent IL-17- and IL-5-producing T-cells from sublethally irradiated Balb/C recipient mice that received adoptive transfers of *Crbn*<sup>+/+</sup> and *Crbn*<sup>-/-</sup> T-cells. (B) H&E histochemistry analyses of skin, colon and liver from representative mice in the GVHD

model. Arrows indicate immune infiltrates and areas of pathology. (C) Schematic of experimental design to assess potential effects of *Crbn* deficiency reconstitution after homeostatic proliferation. *Crbn*<sup>+/+</sup> and *Crbn*<sup>-/-</sup> CD45.2<sup>+</sup> T-cells were adoptively transferred into syngeneic sublethally-irradiated CD45.1<sup>+</sup> mice. (D-E) Average number of divisions of the adoptively transferred CD4<sup>+</sup> (D) and CD8<sup>+</sup> (E) T cells as determined by CellTrace Violet dilution. (F) Number of splenocytes after adoptive cell transfer (ACT) over time. (G-H) Percent of naïve (CD44<sup>Neg</sup>CD62L<sup>+</sup>), Effector (CD44<sup>+</sup>CD62L<sup>Neg</sup>), and Central Memory (CD44<sup>+</sup>CD62L<sup>+</sup>) subsets of (G) CD4<sup>+</sup> T cells and (H) CD8<sup>+</sup> T cells from *Crbn*<sup>+/+</sup> (solid line) and *Crbn*<sup>-/-</sup> (dotted line) mice. n.s. = not significant.

**Supplemental Figure 6.** (A) Secretion of IFN $\gamma$  in unstimulated and vehicle (DMSO) vs. avadomide (Ava)-treated cells activated with increasing doses of anti-CD3 (1, 3, and 5)  $\mu$ g/mL with a constant level of anti-CD28 for 72 hr. (B) IKAROS protein levels determined by flow cytometry in unstimulated and anti-CD3/anti-CD28 activated human CD8<sup>+</sup> T-cells from a three healthy donor (treated with vehicle (DMSO) or IM compounds for 5 days. IM compounds were tested at 10  $\mu$ M and include lenalidomide (Len), pomalidomide (Pom) and avadomide (Ava). Data shown is percentage of cells based on gating of CD8<sup>+</sup> T-cells. (C) MYC protein levels in unstimulated (Unstim) and anti-CD3/anti-CD28 activated human CD4<sup>+</sup> T-cells treated with vehicle or IM compounds for 5 days as detected by flow cytometry. IM compounds were tested at 10  $\mu$ M and include Len, Pom and Ava. JQ1 (BET-inhibitor) was used to show staining specificity for Myc in these experiments; results are represented as geometric mean fluorescent intensity (G-MFI). (D) Expression of CD98 as detected by flow cytometry in CRISPR control (Ctrl), CRISPR-*CRBN* knockdown (CRBN KO) and 10 $\mu$ M Ava-treated CRISPR control (Ava) human CD8<sup>+</sup> T-cells. n.s.=not significant; \*, p<0.05.

**Figure S7. Visual Abstract.** Overview of signaling events harnessed by cereblon (CRBN) in activated CD8<sup>+</sup> T-cells. TCR signaling events increase ERK1/2 expression and activation, which is necessary for activation-induced increases in the levels of Myc mRNA and protein. The MYC:MAX heterodimer transcriptionally induces metabolic gene programs, such as glycolysis, glutaminolysis, and polyamine biosynthesis, and that support activated CD8<sup>+</sup> T-cells and the induction of T<sub>E</sub>-related genes. By studying *Crbn*-deficient CD8<sup>+</sup> T-cells and the effect of modulating compounds, Lenalidomide (Len), pomalidomide (Pom) and avadomide (Ava), we demonstrate that CRBN represses the ERK1/2-MYC circuit that drives metabolism and effector function of activated CD8<sup>+</sup> T-cells. TCR = T-cell receptor, ERK1/2 = extracellular regulated kinase 1/2.

## Supplemental Table 1. Key resources.

| REAGENT or RESOURCE                                   | SOURCE                             | IDENTIFIER            |
|-------------------------------------------------------|------------------------------------|-----------------------|
| <b>Antibodies</b>                                     |                                    |                       |
| CRBN                                                  | Celgene Corp                       | n/a                   |
| c-Myc                                                 | Cell Signaling Technology          | #5605                 |
| IKZF1                                                 | Cell Signaling Technology          | #5443                 |
| CK1 $\alpha$                                          | Cell Signaling Technology          | #2655                 |
| IRF4                                                  | Cell Signaling Technology          | #4948                 |
| $\beta$ -actin-oxidase                                | Sigma                              | #A3854                |
| Monoclonal Anti-Actin antibody produced in mouse      | Sigma                              | #A4700                |
| CD3e Monoclonal Antibody (145-2C11), Functional Grade | ThermoFisher                       | #16-0031-81           |
| CD28 Monoclonal Antibody (37.51), Functional Grade    | ThermoFisher                       | #16-0281-81           |
| CD3 Monoclonal Antibody (HIT3a), Functional Grade     | ThermoFisher                       | #16-0039-81           |
| CD28 Monoclonal Antibody (CD28.2), Functional Grade   | ThermoFisher                       | #16-0289-85           |
| pMyc (T58)                                            | Abcam                              | #ab28842              |
| CD69-PE-CF594                                         | BD Biosciences                     | Clone: H1.2F3         |
| CD3, mouse, multiple fluorochromes used               | Biologend, BD Biosciences or Tonbo | Clone: 17A2           |
| CD3-APC, human                                        | Tonbo                              | Clone: UCHT1          |
| B220, mouse, multiple fluorochromes used              | BD Biosciences or Biologend        | Clone: RA3-6B2        |
| CD19,mouse, multiple fluorochromes used               | Biologend or Invitrogen            | Clone: 6D5            |
| Granzyme B PE-Cy7                                     | Invitrogen                         | Clone: NGZB           |
| NK1.1, mouse                                          | BD Biosciences                     | Clone: PK136          |
| CD8 $\alpha$ , mouse, multiple fluorochromes used     | Biologend, Tonbo or BD             | Clone:53-6.7 or 2.43  |
| CD4, mouse, multiple fluorochromes used               | Biologend, BD Biosciences or Tonbo | Clone: GK1.4 or RM4-5 |
| CD25-APC, mouse                                       | Tonbo                              | Clone: PC61.5         |
| V $\alpha$ 2-PE, mouse                                | eBioscience                        | Clone: B20.1          |
| V $\beta$ 5-FITC, mouse                               | eBioscience                        | Clone: MR9-4          |
| CD98-PE, mouse                                        | Biologend                          | Clone: RL388          |

|                                                                                    |                                 |                         |
|------------------------------------------------------------------------------------|---------------------------------|-------------------------|
| CD98-PE, human                                                                     | BD Biosciences                  | Clone: UM7F8            |
| CD44-BV510                                                                         | Biolegend                       | Clone: IM7              |
| CD127-PE-Cy7, mouse                                                                | Biolegend                       | Clone: A7R34            |
| KLRG1-BV421, mouse                                                                 | Biolegend                       | Clone:<br>2F1/KLRG1     |
| IFN $\gamma$                                                                       | BD Biosciences                  | Clone: XMG1.2           |
| IL-17A                                                                             | BD Biosciences                  | Clone: TC11-<br>18H10.1 |
| IL-5                                                                               | BD Biosciences                  | Clone: TRFK5            |
| c-Myc, human/mouse, multiple colors used                                           | Cell Signaling<br>Technology    | Clone:D84C12            |
| Foxp3, multiple fluorochromes used                                                 | eBioscience                     | Clone: FJK-16s          |
| PD1-PE                                                                             | Tonbo                           | Clone: J43.1            |
| <b>Biological Samples</b>                                                          |                                 |                         |
| Human PBMCs                                                                        | One Blood, St<br>Petersburg, FL | N/A                     |
| <b>Chemicals, Peptides, and Recombinant Proteins</b>                               |                                 |                         |
| OVA (257-264)                                                                      | Anaspec                         | #AS-60193-1             |
| OVA-A2 Peptide, SAINFEKL, OVA (257-264)<br>Variant                                 | Anaspec                         | #AS-64383               |
| OVA-G4 Peptide, SIIGFEKL, OVA (257-264)<br>Variant                                 | Anaspec                         | #AS-64384               |
| TRP - 2 (180 - 188)                                                                | Anaspec                         | #AS-61058               |
| Recombinant Murine IL-2                                                            | Peprtech                        | #212-12                 |
| Recombinant Murine IFN $\gamma$                                                    | Peprtech                        | #315-05                 |
| 2-Deoxy-D-glucose                                                                  | Sigma                           | #D8375                  |
| Oligomycin A                                                                       | Sigma                           | #75351                  |
| <sup>13</sup> C <sub>4</sub> -putrescine                                           | Cambridge Isotope<br>Labs       | # CLM-6574              |
| <sup>13</sup> C <sub>5</sub> -ornithine                                            | Cambridge Isotope<br>Labs       | #CLM-4724               |
| 1,1,2,2,3,3,4,4-D <sub>8</sub> -N-(3-Aminopropyl) Butane-1,4-<br>Diamine:3HCL      | Cambridge Isotope<br>Labs       | #DLM-9262               |
| 1,1,2,2,3,3,4,4-D <sub>8</sub> -N,N'-Bis(3-Aminopropyl)-1,4-<br>Butanediamine:4HCL | Cambridge Isotope<br>Labs       | #DLM-9262               |
| HPLC Grade Water                                                                   | Honeywell<br>Chemicals          | #AH3654                 |
| HPLC Grade Methanol                                                                | Honeywell<br>Chemicals          | #AH2304                 |
| HPLC Grade Acetonitrile                                                            | Honeywell<br>Chemicals          | #AH0154                 |
| Formic Acid                                                                        | Thermo Fisher                   | #PI28905                |
| Accucore C18 Column 150 x 3.0 mm, 2.6 $\mu$ m                                      | Thermo Fisher                   | #27826-153030           |
| Ionomycin                                                                          | Thermo Fisher                   | #I24222                 |
| Fluo4AM                                                                            | Thermo Fisher                   | #F14217                 |
| Thapsigargin                                                                       | Thermo Fisher                   | #T7428                  |

|                                                                   |                                 |                |
|-------------------------------------------------------------------|---------------------------------|----------------|
| Heptafluorobutyric acid                                           | ProteoChem                      | #LC6206        |
| Hyaluronidase V                                                   | Sigma                           | #H6254         |
| Collagenase type I                                                | Sigma                           | #SCR103        |
| Collagenase type IV                                               | Sigma                           | #C5138         |
| DNAse I                                                           | Sigma                           | #DN25          |
| JQ-1                                                              | Sigma                           | #SML0974       |
| 10074-G5                                                          | Sigma                           | #G3798         |
| RIPA buffer                                                       | Sigma                           | #R0278         |
| Calcium Chloride                                                  | Sigma                           | #C4901         |
| MycMI-11 (NSC 11656)                                              | NCI                             |                |
| Recombinant Mouse IL-2 Protein                                    | R&D Systems                     | #402           |
| L-TYROSINE (RING- <sup>13</sup> C <sub>6</sub> , 99%)             | Cambridge Isotope Labs          | #CLM-1542      |
| L-TRYPTOPHAN ( <sup>13</sup> C <sub>11</sub> , 99%)               | Cambridge Isotope Labs          | #CLM-4290-H-PK |
| L-LEUCINE ( <sup>13</sup> C <sub>6</sub> , 99%)                   | Cambridge Isotope Labs          | #CLM-2262-H-PK |
| L-PHENYLALANINE (RING- <sup>13</sup> C <sub>6</sub> , 99%)        | Cambridge Isotope Labs          | #CLM-1055-0    |
| N-BOC-L-tert-Leucine, 98%                                         | Acros Organics                  | #368010010     |
| N-BOC-L-Aspartic acid, 99%                                        | Acros Organics                  | #303210010     |
| BOC-L-Tyrosine, 99+%                                              | Acros Organics                  | #275700050     |
| Nalpha-BOC-L-Tryptophane, 97%                                     | Acros Organics                  | #275690050     |
| BOC-D-Phenylalanine, 99+%                                         | Acros Organics                  | #275740050     |
| Creatine-d <sub>3</sub> H <sub>2</sub> O (methyl-d <sub>3</sub> ) | CDN isotopes                    | #D-1972        |
| D-Leucine-d <sub>10</sub>                                         | CDN isotopes                    | #D-5607        |
| L-Tryptophan-2,3,3-d <sub>3</sub>                                 | CDN isotopes                    | #D-7419        |
| Water with 0.1% Formic Acid (v/v), Optima™ LC/MS Grade            | Fisher Scientific               | #LS1184        |
| Citric acid ( <sup>13</sup> C <sub>6</sub> , 99%)                 | Cambridge Isotope Labs          | #CLM-9021      |
| GLUTAMINE, L-[14C(U)]                                             | American Radiolabeled Chemicals | #ARC0196-50    |
| PD98059                                                           | Caymen Chemical                 | #10006726      |
| Arginine L-[14C(U)]                                               | Perkin Elmer                    | #NEC267E050UC  |
| <b>Critical Commercial Assays</b>                                 |                                 |                |
| IFN gamma Mouse ELISA Kit                                         | ThermoFisher                    | #KMC4022       |
| Seahorse XF Cell Mito Stress Test Kit                             | Agilent                         | #103015-100    |
| Mouse IL-2 Recombinant Protein, eBioscience                       | Invitrogen                      | #14-8021-64    |
| Mouse IL-17 Quantikine ELISA Kit                                  | R&D systems                     | #M1700         |
| Mouse IL-10 Quantikine ELISA Kit                                  | R&D systems                     | #M1000B        |
| Mouse TNF-alpha Quantikine ELISA Kit                              | R&D systems                     | #MTA00B        |
| Mouse IFN-gamma Quantikine ELISA Kit                              | R&D systems                     | #MIF00         |
| Mouse IL-4 Quantikine ELISA Kit                                   | R&D systems                     | #M4000B        |
| Human IFNγ ELISA Ready-Set-Go                                     | eBioscience                     | #88-7316-88    |

|                                                  |                                                                                         |              |
|--------------------------------------------------|-----------------------------------------------------------------------------------------|--------------|
| Pierce™ LDH Cytotoxicity Assay Kit               | Thermo Fisher                                                                           | #88953       |
| Hexokinase Activity Assay Kit (Colorimetric)     | Abcam                                                                                   | #ab136957    |
| NAD/NADH-Glo™ Assay                              | Promega                                                                                 | #G9071       |
| GeneChip™ Mouse Genome 430 2.0 Array             | Thermo Fisher                                                                           | #900495      |
| Qubit Protein Assay Kit                          | Thermo Fisher                                                                           | #Q33211      |
| MessageAmp™ Premier RNA Amplification Kit        | Thermo Fisher                                                                           | #AM1792      |
| ATPlite Luminescence Assay System, 300 Assay Kit | Perkin Elmer                                                                            | #6016943     |
| <b>Deposited Data</b>                            |                                                                                         |              |
| Microarray data                                  | Gene Expression Omnibus                                                                 | GSE81725     |
| <b>Experimental Models: Organisms/Strains</b>    |                                                                                         |              |
| C57Bl6                                           | Jackson                                                                                 | #000664      |
| CD45.1                                           | Jackson                                                                                 | #002014      |
| OT1                                              | Jackson                                                                                 | #003831      |
| BALB/cJ                                          | Jackson                                                                                 | #000651      |
| <i>Crbn</i> <sup>-/-</sup>                       |                                                                                         | N/A          |
| <b>Oligonucleotides</b>                          |                                                                                         |              |
| Mm00487804_m1 <i>Myc</i>                         | ThermoFisher                                                                            | #4331182     |
| Mm01182414_m1 <i>Crbn</i>                        | ThermoFisher                                                                            | #4351372     |
| Mm00437762_m1 <i>B2m</i>                         | ThermoFisher                                                                            | #4331182     |
| Mm00446971_m1 <i>Tbp</i>                         | ThermoFisher                                                                            | #4331182     |
| Mm01168134_m1 <i>Ifng</i>                        | ThermoFisher                                                                            | #4331182     |
| Mm00434599_s1 <i>Kcna3</i>                       | ThermoFisher                                                                            | #4331182     |
| RT-PCR Primers (Supplemental Table)              | IDT                                                                                     | N/A          |
| Genotyping primers (Supplemental Table)          | IDT                                                                                     | N/A          |
| <b>Software and Algorithms</b>                   |                                                                                         |              |
| Graphpad V7                                      | GraphPad Software                                                                       |              |
| Flowjo V10                                       | BD                                                                                      |              |
| Metaboanalyst 4.0                                | <a href="http://www.metaboanalyst.ca/">http://www.metaboanalyst.ca/</a>                 |              |
| Xcalibur Quan Browser                            | Thermo Fisher                                                                           |              |
| Partek                                           | Partek, Inc.                                                                            |              |
| Gene Go                                          | Thomson Reuters                                                                         |              |
| ImageJ                                           | <a href="http://imagej.nih.gov/ij/">http://imagej.nih.gov/ij/</a>                       |              |
| MZmine                                           | <a href="http://mzmine.github.io/">http://mzmine.github.io/</a>                         |              |
| MSConvert                                        | <a href="http://proteowizard.sourceforge.net/">http://proteowizard.sourceforge.net/</a> |              |
| Wave version 2.6                                 | Agilent Technologies                                                                    |              |
| <b>Other</b>                                     |                                                                                         |              |
| Pan T cell Isolation Kit II, mouse               | Miltenyi                                                                                | #130-095-130 |
| CD8a+ T cell Isolation Kit, mouse                | Miltenyi                                                                                | #130-104-075 |

|                                                                        |                   |               |
|------------------------------------------------------------------------|-------------------|---------------|
| CD4+ T cell Isolation Kit, mouse                                       | Miltenyi          | #130-104-454  |
| B cell Isolation Kit, mouse                                            | Miltenyi          | #130-090-862  |
| CD3e Microbead Kit, mouse                                              | Miltenyi          | #130-094-973  |
| EasySep™ Mouse T Cell Isolation Kit                                    | Stemcell          | #19851        |
| RosetteSep Human T cell Enrichment Cocktail                            | Stemcell          | #15061        |
| EasySep, Human CD8+ T cell Isolation Kit                               | Stemcell          | #17953        |
| CD4 Microbeads, human                                                  | Miltenyi          | #130-045-101  |
| Leukocyte Activation Cocktail, with BD GolgiPlug™                      | BD Biosciences    | #550583       |
| CellTrace Violet                                                       | Molecular Probes  | #C34557       |
| iTAgiTAg Tetramer/PE – H-2 Kb OVA (SIINFEKL)                           | MBL               | #T0300        |
| 2-NBDG (2-(N-(7-Nitrobenz-2-oxa-1,3-diazol-4-yl)Amino)-2-Deoxyglucose) | Molecular Probes  | #N13195       |
| Zombie NIR                                                             | Biolegend         | # 423105      |
| Ghost Dye Red 780                                                      | Tonbo             | #13-0865-T500 |
| MitoTracker Green                                                      | Thermo Fisher     | # M7514       |
| CellROX Green Reagent for oxidative stress detection                   | Thermo Fisher     | #C10444       |
| MitoSOX Red Mitochondrial Superoxide Indicator                         | Thermo Fisher     | #M36008       |
| 7-AAD                                                                  | BD Biosciences    | #559925       |
| DAPI (4',6-Diamidino-2-Phenylindole, Dihydrochloride)                  | Thermo Fisher     | #D1306        |
| Live/Dead Yellow                                                       | Molecular Probes  | #L34959       |
| CD3 Microbead Kit                                                      | Miltenyi          | #130-094-973  |
| Power SYBR™ Green PCR Master Mix                                       | Thermo Fisher     | #4367659      |
| Taqman Universal PCR Master Mix                                        | Thermo Fisher     | #4304437      |
| iPrep™ Trizol™ Plus RNA Kit                                            | Thermo Fisher     | #IS10007      |
| eBioscience™ Foxp3 / Transcription Factor Staining Buffer Set          | Thermo Fisher     | #00-5523-00   |
| iScript™ Reverse Transcription Supermix for RT-qPCR                    | Bio-Rad           | #1708841      |
| RNeasy Plus Mini Kit                                                   | Qiagen            | #74134        |
| NucleoSpin RNA                                                         | Macherey-Nagel    | #740955.250   |
| RPMI Media                                                             | Thermo Fisher     | #11875        |
| Zirconia Beads                                                         | Biospec Products  | #11079107zx   |
| Corning Cell-Tak Cell and Tissue Adhesive                              | Fisher Scientific | #40240        |
| iTAg Tetramer/APC - H-2 Kb TRP2 (SVYDFFVWL)                            | MBL               | #T03015       |



## Supplemental Table 2. Primers for genotyping mice by genomic PCR

| Mouse strain               | Primer                                 | Sequence 5'-3'           |
|----------------------------|----------------------------------------|--------------------------|
| <i>Crbn</i> <sup>-/-</sup> | <i>Loxf</i> (Wild-type forward primer) | AGGAGCACTGAACGGCTTACAG   |
| <i>Crbn</i> <sup>-/-</sup> | <i>f</i> (knockout forward primer)     | TTGTTTCAGAACTGCTGGGATGTG |
| <i>Crbn</i> <sup>-/-</sup> | <i>LoxR</i> (common reverse primer)    | CGCATGCTGACTGATCACAGC    |

### Supplemental Table 3. Primers for RT-PCR analyses

| Gene                      | Sequence 5'-3'           |
|---------------------------|--------------------------|
| <i>Slc7a1</i> Forward     | TGGTCTTGTGCTTCATCGTG     |
| <i>Slc7a1</i> Reverse     | GACACCAGAGAATCCAAAGGG    |
| <i>Slc38a1</i> Forward    | TTACCAACCATCGCCTTC       |
| <i>Slc38a1</i> Reverse    | ATGAGAATGTGCGCCTGTG      |
| <i>Slc38a2</i> Forward    | GGTATCTGAACGGTGACTATCTG  |
| <i>Slc38a2</i> Reverse    | TCTGCGGTGCTATTGAATGC     |
| <i>Granzyme B</i> Forward | TGCTGCTAAAGCTGAAGAGTAAG  |
| <i>Granzyme B</i> Reverse | CGTGTTTGAGTATTTGCCATTG   |
| <i>T-bet</i> Forward      | CCTGGACCCAACTGTCAACT     |
| <i>T-bet</i> Reverse      | AACTGTGTTCCCGAGGTGTC     |
| <i>Eomes</i> Forward      | TACGGCCAGGGTTCTCCGCTCTAC |
| <i>Eomes</i> Reverse      | GGGCCGGTTGCACAGGTAGACGTG |
| <i>Perforin</i> Forward   | GCAGCTGAGAAGACCTATCAGGAC |
| <i>Perforin</i> Reverse   | TCTGAGCGCCTTTTTGAAGTC    |
| <i>B2M</i> Forward        | TTCTGGTGCTTGTCTCACTGA    |
| <i>B2M</i> Reverse        | CAGTATGTTTCGGCTTCCCATTC  |
| <i>Odc1</i> Forward       | GACGAGTTTGACTGCCACATC    |
| <i>Odc1</i> Reverse       | CGCAACATAGAACGCATCCTT    |
| <i>Oat</i> Forward        | GGAGTCCACACCTCAGTCG      |
| <i>Oat</i> Reverse        | CCACATCCCACATATAAATGCCT  |
| <i>Srm</i> Forward        | ACATCCTCGTCTTCCGCAGTA    |
| <i>Srm</i> Reverse        | GGCAGGTTGGCGATCATCT      |
| <i>Sms</i> Forward        | CACAGCACGCTCGACTTCAA     |
| <i>Sms</i> Reverse        | TGCCATTCTTGTTTCGTGTAAGTT |

**Supplemental Table 4. Distribution of immune cells in *Crbn*<sup>-/-</sup> mice**

|                                                                                                   | <i>Crbn</i> <sup>+/+</sup> |          | <i>Crbn</i> <sup>-/-</sup> |          |                |
|---------------------------------------------------------------------------------------------------|----------------------------|----------|----------------------------|----------|----------------|
| <i>Population name</i>                                                                            | <i>Mean (SD)</i>           | <i>n</i> | <i>Mean (SD)</i>           | <i>n</i> | <i>P-value</i> |
| <b>Thymic Populations</b>                                                                         |                            |          |                            |          |                |
| • CD4 <sup>+</sup> (SP)                                                                           | 16.5 (4.6)                 | 11       | 14.7 (4.5)                 | 9        | 0.39           |
| • CD8 <sup>+</sup> (SP)                                                                           | 5.4 (2.6)                  | 11       | 4.7 (2.3)                  | 9        | 0.52           |
| • CD4 <sup>+</sup> /CD8 <sup>+</sup> (DP)                                                         | 65.1 (14.2)                | 11       | 63.1 (13.7)                | 9        | 0.77           |
| • CD4 <sup>-</sup> /CD8 <sup>-</sup> (DN)                                                         | 13.0 (7.2)                 | 11       | 14.6 (9.2)                 | 9        | 0.69           |
| • DN1                                                                                             | 10.2 (2.5)                 | 11       | 11.8 (3.0)                 | 9        | 0.25           |
| • DN2                                                                                             | 7.9 (5.1)                  | 11       | 6.3 (4.9)                  | 9        | 0.51           |
| • DN3                                                                                             | 51.0 (12.9)                | 11       | 53.1 (13.4)                | 9        | 0.74           |
| • DN4                                                                                             | 31.0 (6.9)                 | 11       | 28.9 (6.4)                 | 9        | 0.51           |
| <b>Splenic Lymphocytes</b>                                                                        |                            |          |                            |          |                |
| • B220 <sup>+</sup> CD3 <sup>-</sup> B cell                                                       | 32.8 (8.5)                 | 11       | 33.5 (16.5)                | 11       | 0.90           |
| • B220 <sup>-</sup> CD3 <sup>+</sup> T cells                                                      | 45.9 (6.7)                 | 11       | 36.4 (7.1)                 | 11       | <b>0.004</b>   |
| • B220 <sup>-</sup> CD3 <sup>-</sup> NK1.1 <sup>+</sup> NK cells                                  | 18.8 (6.2)                 | 11       | 19.4 (10.9)                | 11       | 0.87           |
| • CD3 <sup>+</sup> CD8 <sup>+</sup> T cells                                                       | 25.7 (5.1)                 | 11       | 29.7 (8.9)                 | 11       | 0.21           |
| • CD3 <sup>+</sup> CD4 <sup>+</sup> T cells                                                       | 62.3 (15.8)                | 11       | 65.4 (10.2)                | 11       | 0.58           |
| • CD3 <sup>+</sup> CD4 <sup>+</sup> CD25 <sup>+</sup> Foxp3 <sup>+</sup> T reg cells              | 9.7 (0.7)                  | 3        | 10.8 (4.9)                 | 3        | 0.71           |
| • CD3 <sup>+</sup> CD4 <sup>+</sup> CD69 <sup>+</sup> T cells                                     | 6.0 (1.7)                  | 11       | 5.1 (0.9)                  | 11       | 0.17           |
| • CD3 <sup>+</sup> CD8 <sup>+</sup> CD69 <sup>+</sup> T cells                                     | 4.6 (0.8)                  | 11       | 3.8 (1.0)                  | 11       | <b>0.05</b>    |
| • CD3 <sup>+</sup> CD4 <sup>+</sup> CD25 <sup>+</sup> T cells                                     | 4.2 (0.7)                  | 11       | 4.7 (0.9)                  | 11       | 0.09           |
| • CD3 <sup>+</sup> CD8 <sup>+</sup> CD25 <sup>+</sup> T cells                                     | 0.5 (0.6)                  | 11       | 0.7 (0.8)                  | 11       | 0.55           |
| <b>Lymph Node Lymphocytes</b>                                                                     |                            |          |                            |          |                |
| • B220 <sup>-</sup> CD3 <sup>+</sup> T cells                                                      | 77.9 (6.9)                 | 11       | 77.4 (6.9)                 | 11       | 0.85           |
| • B220 <sup>-</sup> CD3 <sup>-</sup> NK1.1 <sup>+</sup> NK cells                                  | 22.8 (18.1)                | 11       | 27.7 (15.8)                | 11       | 0.50           |
| • CD3 <sup>+</sup> CD8 <sup>+</sup> T cells                                                       | 32.8 (10.5)                | 11       | 36.0 (11.8)                | 11       | 0.51           |
| • CD3 <sup>+</sup> CD4 <sup>+</sup> T cells                                                       | 65.7 (10.2)                | 11       | 62.3 (11.6)                | 11       | 0.47           |
| • CD3 <sup>+</sup> CD4 <sup>+</sup> CD25 <sup>+</sup> Foxp3 <sup>+</sup> Treg cells (n=3)         | 10.5 (0.8)                 | 11       | 10.3 (0.7)                 | 3        | 0.72           |
| • CD3 <sup>+</sup> CD4 <sup>+</sup> CD69 <sup>+</sup> T cells                                     | 6.6 (0.8)                  | 11       | 6.9 (0.7)                  | 11       | 0.35           |
| • CD3 <sup>+</sup> CD8 <sup>+</sup> CD69 <sup>+</sup> T cells                                     | 4.6 (0.9)                  | 11       | 5.0 (1.0)                  | 11       | 0.41           |
| • CD3 <sup>+</sup> CD4 <sup>+</sup> CD25 <sup>+</sup> T cells                                     | 4.0 (1.0)                  | 11       | 4.8 (1.2)                  | 11       | 0.11           |
| • CD3 <sup>+</sup> CD8 <sup>+</sup> CD25 <sup>+</sup> T cells                                     | 0.5 (0.5)                  | 11       | 0.5 (0.3)                  | 11       | 0.93           |
| <b>Splenic Memory Populations</b>                                                                 |                            |          |                            |          |                |
| CD3 <sup>+</sup> CD4 <sup>+</sup> CD44 <sup>-</sup> CD127 <sup>+</sup> KLRG1 <sup>-</sup> T cells | 70.8 (4.0)                 | 7        | 69.4 (5.1)                 | 7        | 0.56           |
| CD3 <sup>+</sup> CD4 <sup>+</sup> CD44 <sup>+</sup> CD127 <sup>+</sup> KLRG1 <sup>-</sup> T cells | 11.4 (2.3)                 | 7        | 11.0 (1.4)                 | 7        | 0.72           |
| CD3 <sup>+</sup> CD4 <sup>+</sup> CD44 <sup>+</sup> CD127 <sup>-</sup> KLRG1 <sup>+</sup> T cells | 0.2 (0.1)                  | 7        | 0.2 (0.1)                  | 7        | 0.23           |
| CD3 <sup>+</sup> CD8 <sup>+</sup> CD44 <sup>-</sup> CD127 <sup>+</sup> KLRG1 <sup>-</sup> T cells | 74.8 (3.2)                 | 7        | 75.6 (2.9)                 | 7        | 0.63           |
| CD3 <sup>+</sup> CD8 <sup>+</sup> CD44 <sup>+</sup> CD127 <sup>+</sup> KLRG1 <sup>-</sup> T cells | 14.4 (3.9)                 | 7        | 13.9 (1.6)                 | 7        | 0.73           |
| CD3 <sup>+</sup> CD8 <sup>+</sup> CD44 <sup>+</sup> CD127 <sup>-</sup> KLRG1 <sup>+</sup> T cells | 0.3 (0.1)                  | 7        | 0.6 (0.4)                  | 7        | 0.08           |

**Supplemental Table 5. Statistical comparisons, in reference to Figure 7**

| Function                      | Population                                           | Comparison                                                                   | Sample size              | P-value                                | Summary     |         |       |
|-------------------------------|------------------------------------------------------|------------------------------------------------------------------------------|--------------------------|----------------------------------------|-------------|---------|-------|
| Glucose uptake (2-NBDG, gMFI) | CD8 <sup>+</sup> T-cells                             | DMSO vs Len                                                                  | 3 technical              | <0.0001                                | *****       |         |       |
|                               |                                                      | DMSO vs Pom                                                                  | 3 technical              | <0.0001                                | *****       |         |       |
|                               |                                                      | DMSO vs CC122                                                                | 3 technical              | <0.0001                                | *****       |         |       |
|                               | CD8 <sup>+</sup> T-cells<br>10074-G5 10 μM           | DMSO vs DMSO+10074-G5 (impact of Myc suppression on activated human T-cells) | 3 technical              | 0.5891                                 | n.s.        |         |       |
|                               |                                                      | Len vs Len+10074-G5                                                          | 3 technical              | >0.9999                                | n.s.        |         |       |
|                               |                                                      | Pom vs Pom+ 10074-G5                                                         | 3 technical              | >0.9999                                | n.s.        |         |       |
|                               |                                                      | CC122 vs CC122+10074-G5                                                      | 3 technical              | 0.3599                                 | n.s.        |         |       |
|                               |                                                      | CD8 <sup>+</sup> T-cells<br>10074-G5 30 μM                                   | DMSO vs DMSO+10074-G5    | 3 technical                            | >0.9999     | n.s.    |       |
|                               |                                                      |                                                                              | Len vs Len+10074-G5      | 3 technical                            | <0.0001     | *****   |       |
| Pom vs Pom+ 10074-G5          | 3 technical                                          |                                                                              | <0.0001                  | *****                                  |             |         |       |
|                               |                                                      | CC122 vs CC122+10074-G5                                                      | 3 technical              | <0.0001                                | *****       |         |       |
|                               |                                                      | FCS-A Mean (x100)                                                            | CD8 <sup>+</sup> T-cells | Unstimulated vs stimulated (not shown) | 3 technical |         |       |
|                               |                                                      |                                                                              |                          | DMSO vs Len                            | 3 technical | <0.0001 | ***** |
|                               |                                                      | DMSO vs Pom                                                                  | 3 technical              | <0.0001                                | *****       |         |       |
|                               |                                                      | DMSO vs CC122                                                                | 3 technical              | 0.0034                                 | **          |         |       |
|                               | CD8 <sup>+</sup> T-cells treated with 10074-G5 10 μM | DMSO vs DMSO+10074-G5                                                        | 3 technical              | 0.5987                                 | n.s.        |         |       |
|                               |                                                      | Len vs Len+10074-G5 10μM                                                     | 3 technical              | <0.0001                                | *****       |         |       |
|                               |                                                      | Pom vs Pom+ 10074-G5 10μM                                                    | 3 technical              | 0.0010                                 | **          |         |       |
|                               |                                                      | CC122 vs CC122+10074-G5 10μM                                                 | 3 technical              | 0.0012                                 | **          |         |       |
|                               | CD8 <sup>+</sup> T-cells treated with 10074-G5 30 μM | DMSO vs DMSO+10074-G5                                                        | 3 technical              | 0.0066                                 | **          |         |       |
|                               |                                                      | Len vs Len+10074-G5                                                          | 3 technical              | <0.0001                                | *****       |         |       |
|                               |                                                      | Pom vs Pom+ 10074-G5                                                         | 3 technical              | <0.0001                                | *****       |         |       |
|                               |                                                      | CC122 vs CC122+10074-G5                                                      | 3 technical              | <0.0001                                | *****       |         |       |

## SUPPLEMENTAL REFERENCES

1. Rajadhyaksha AM, Ra S, Kishinevsky S, et al. Behavioral characterization of cereblon forebrain-specific conditional null mice: a model for human non-syndromic intellectual disability. *Behav Brain Res.* 2012;226(2):428-434.
2. Hogquist KA, Jameson SC, Heath WR, Howard JL, Bevan MJ, Carbone FR. T cell receptor antagonist peptides induce positive selection. *Cell.* 1994;76(1):17-27.
3. Van Gelder RN, von Zastrow ME, Yool A, Dement WC, Barchas JD, Eberwine JH. Amplified RNA synthesized from limited quantities of heterogeneous cDNA. *Proc Natl Acad Sci U S A.* 1990;87(5):1663-1667.
4. Warrington JA, Nair A, Mahadevappa M, Tsyganskaya M. Comparison of human adult and fetal expression and identification of 535 housekeeping/maintenance genes. *Physiol Genomics.* 2000;2(3):143-147.
5. Valenzuela JO, Iclozan C, Hossain MS, et al. PKC $\theta$  is required for alloreactivity and GVHD but not for immune responses toward leukemia and infection in mice. *J Clin Invest.* 2009;119(12):3774-3786.
6. Xia J, Wishart DS. Using MetaboAnalyst 3.0 for Comprehensive Metabolomics Data Analysis. *Curr Protoc Bioinformatics.* 2016;55:14.10.11-14.10.91.
7. Muller, G.; Man, H.-W.; Cohen, B. M.; Li, Y.; Xu, J.; Leong, W. W. Solid forms of 3-(5-Amino-2-methyl-4-oxo-4H-quinazolin-3-yl)piperidine-2,6-dione, *US Patent App.*, US2012/232100(A1),(2012).
8. Bogert T. M.; Chambers J. V. The synthesis of 5-nitro-4-ketodihydroquinazolines from 6-nitro-2-aminobenzoic acid, 6-nitro-2-acetylaminobenzoic acid, and from the corresponding nitroacetylanthranil. *JACS* **27**, 649-658 (1905).
9. Muller, G. W.; Man, H.W. 5-Substituted quinazolinone derivatives and compositions comprising and methods of using the same. *PCT Pat. App.*, WO2008039489(A2) (2008).
10. Möhrle, H.; Lieck-Waldheim, U. V. D.; Martin, H. D.; Possberg, N.; Beutner, S. Reaction of ethacridine lactate with nitrous and the colour-structure relationships with acridine derivatives. Part 3: Analytics of ethacridine lactate. *Pharmazie* **52**, 603–611 (1997).
11. Timmis, G. M.; Felton, D. G. I. , Collier H.O.J, Haskinson P.L. Structure-activity relations in two new series of antifolic acids. *J. Pharm. Pharmacology* **9**, 46–67 (1957).
12. Pluskal T, Castillo S, Villar-Briones A, Oresic M. MZmine 2: modular framework for processing, visualizing, and analyzing mass spectrometry-based molecular profile data. *BMC Bioinformatics.* 2010;11:395.

# Supplemental Figure 1

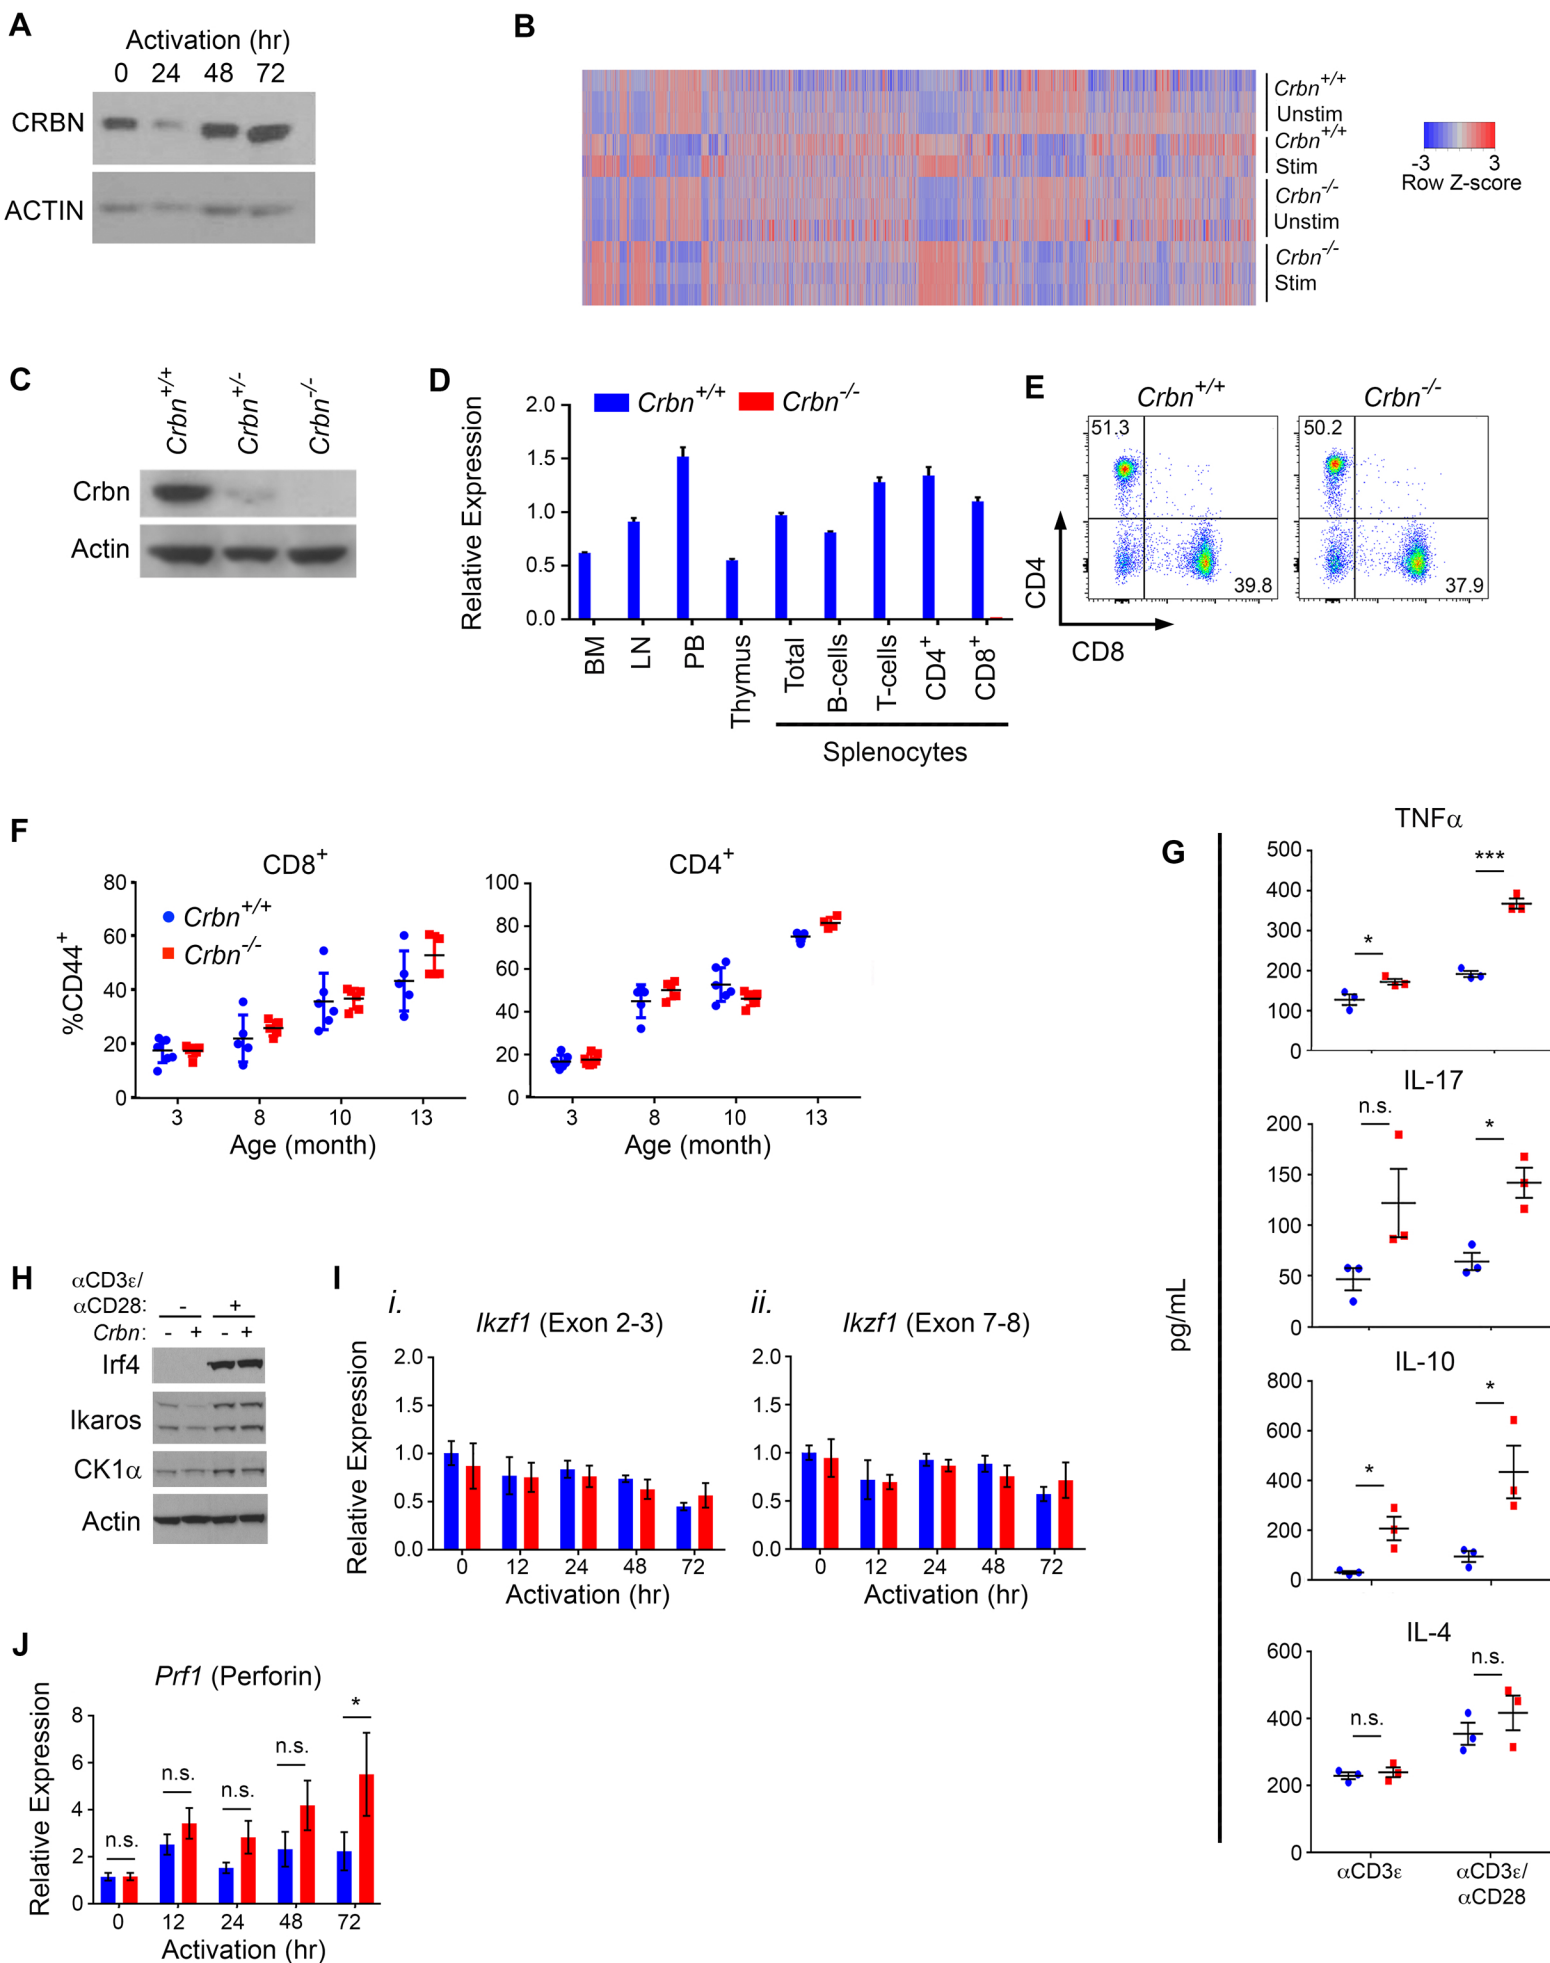

# Supplemental Figure 2

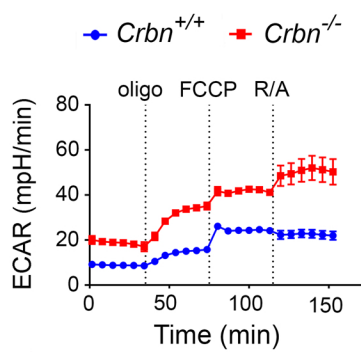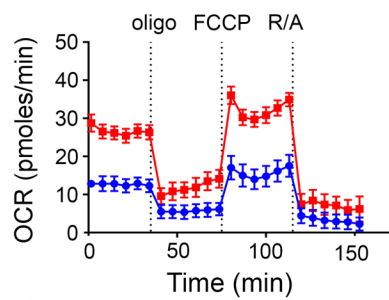

**Supplemental Figure 3**

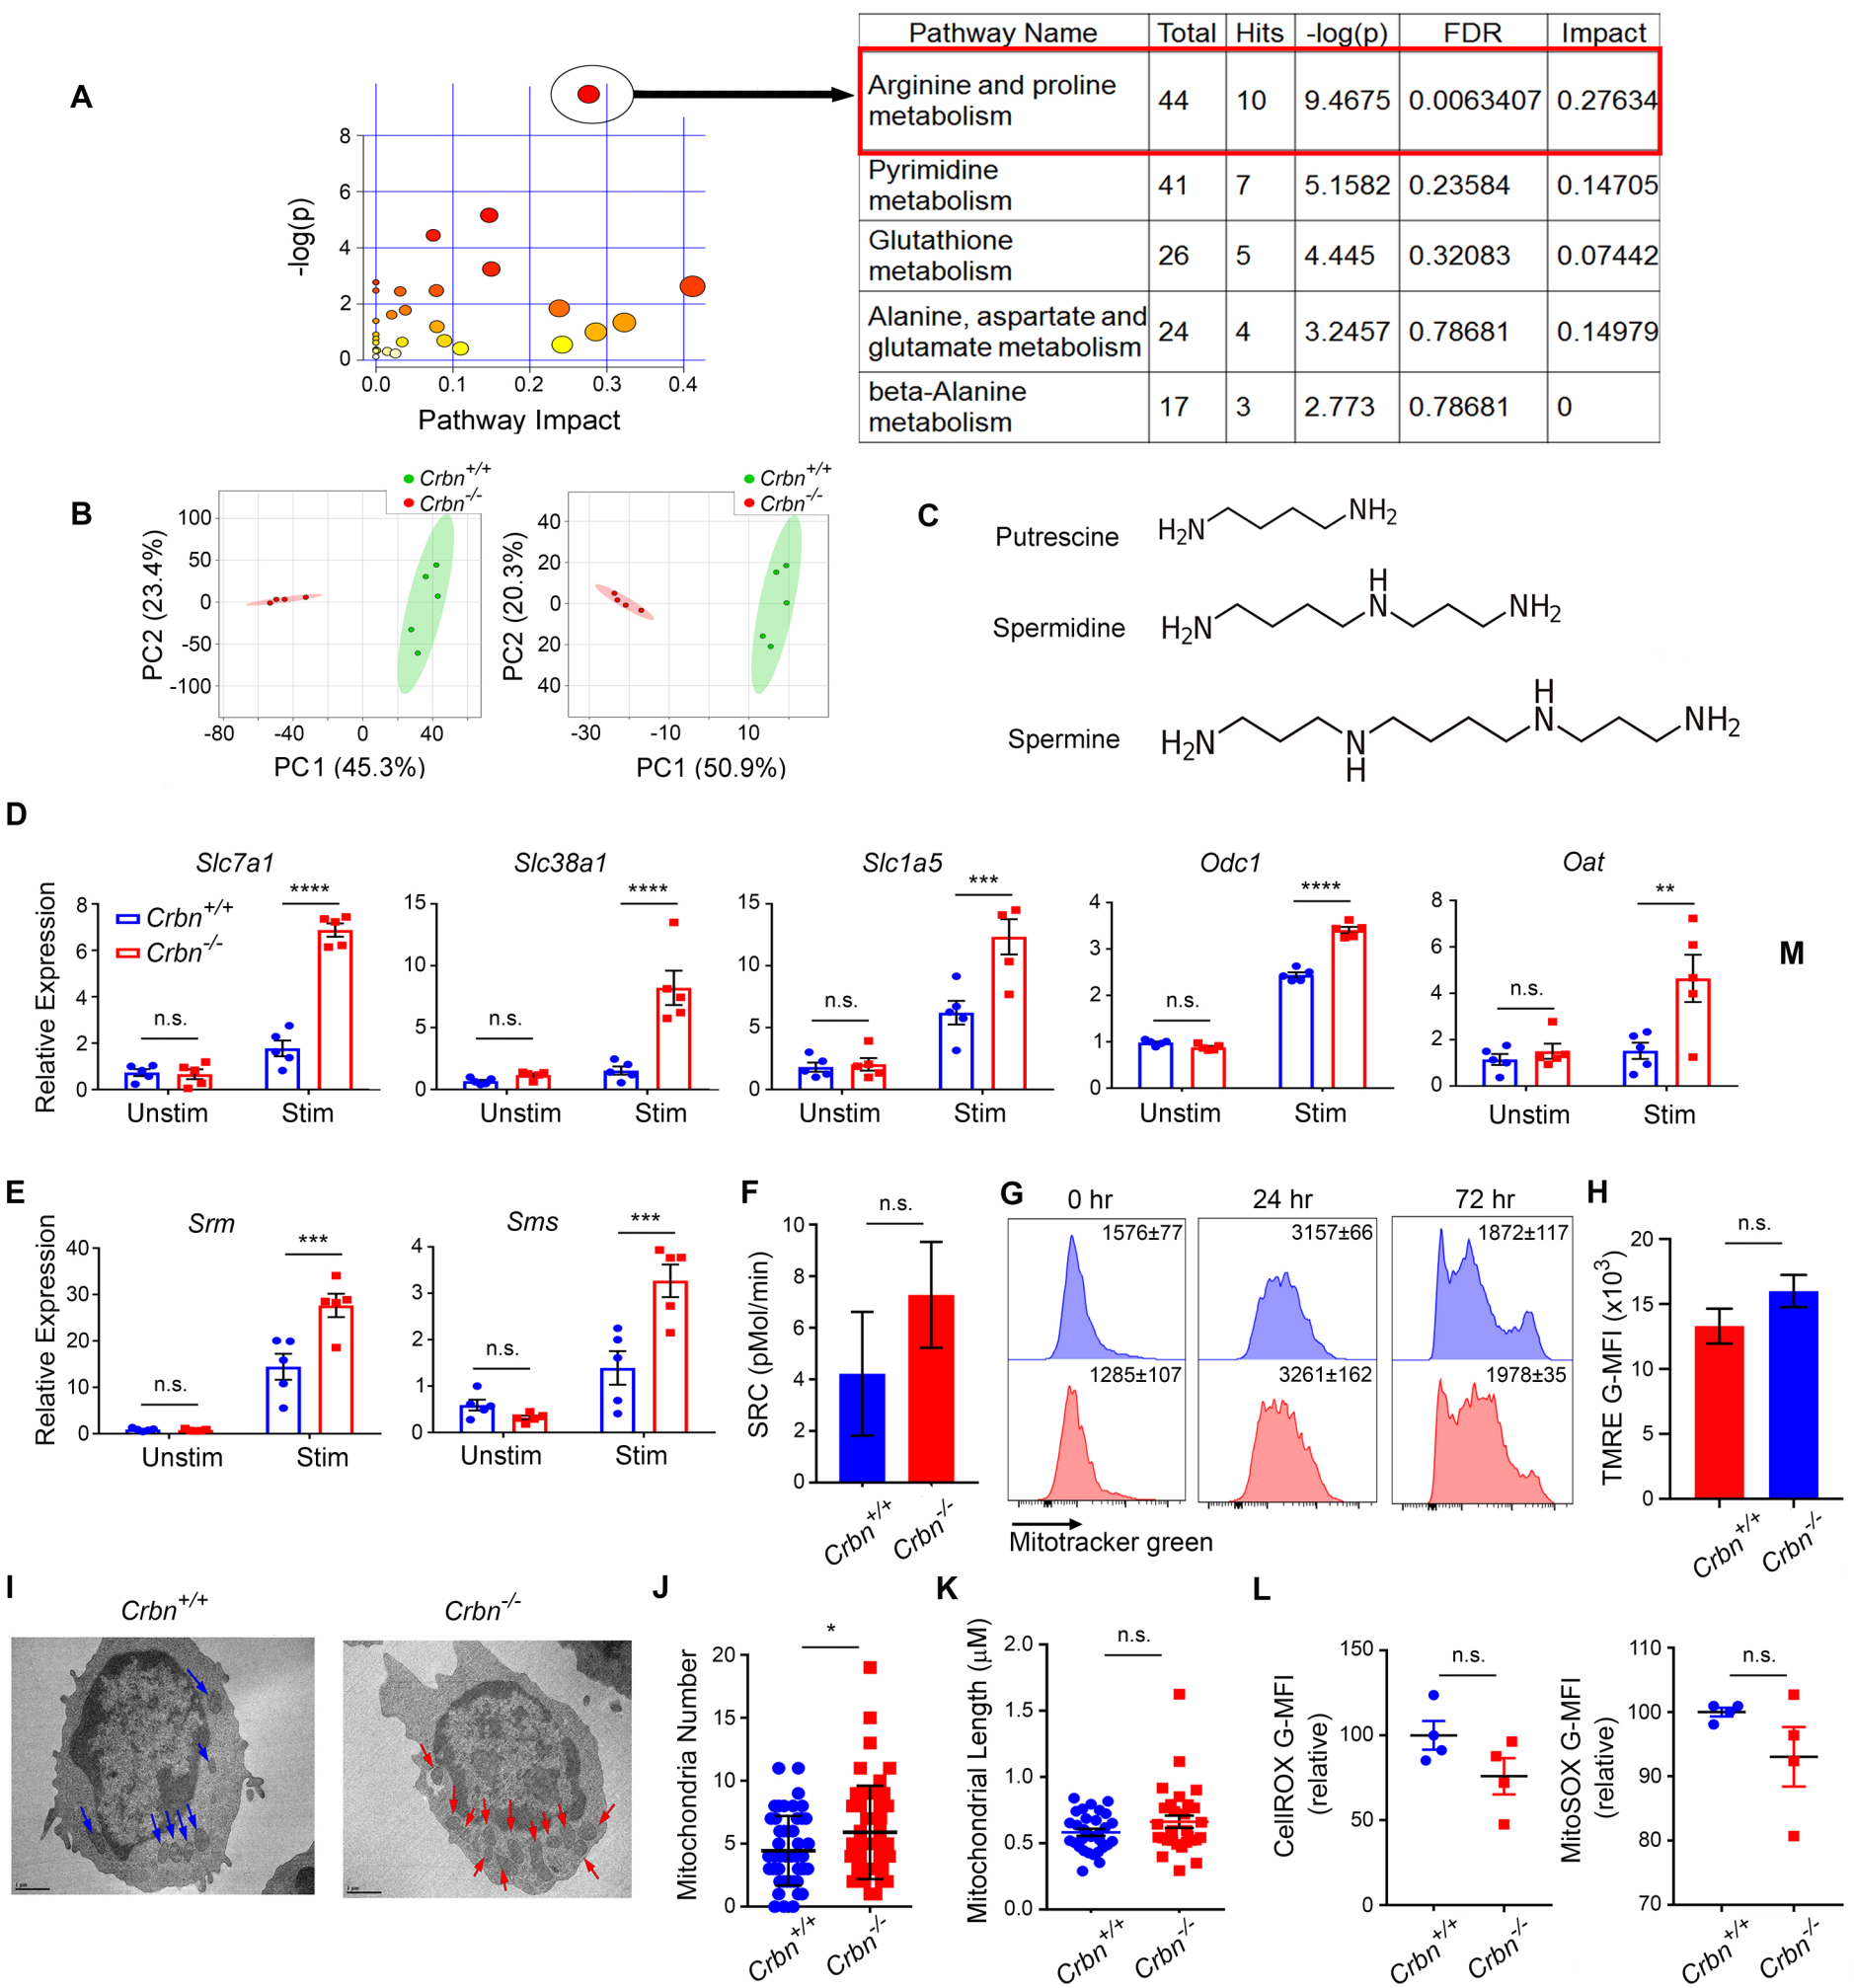



# Supplemental Figure 4

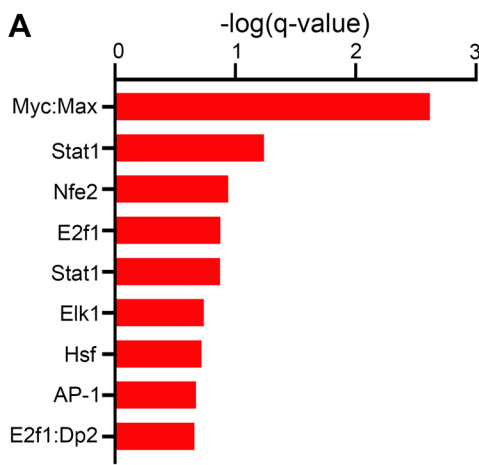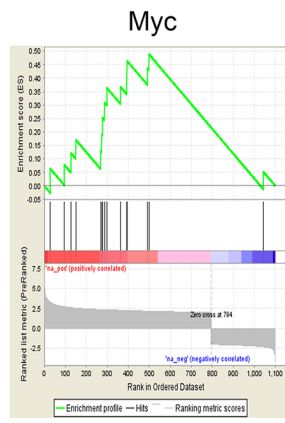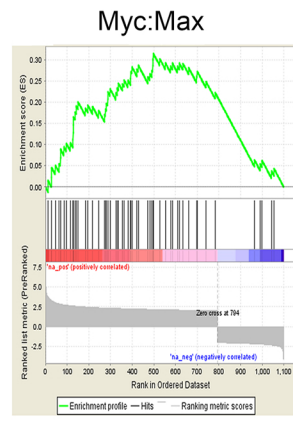

FDR q-val 0.002

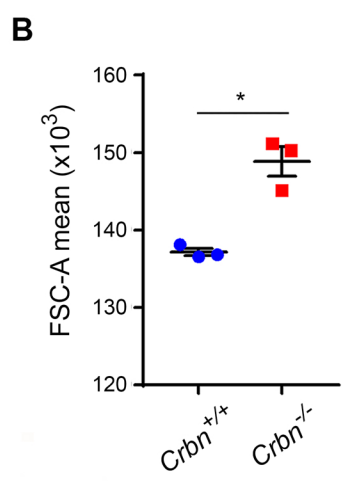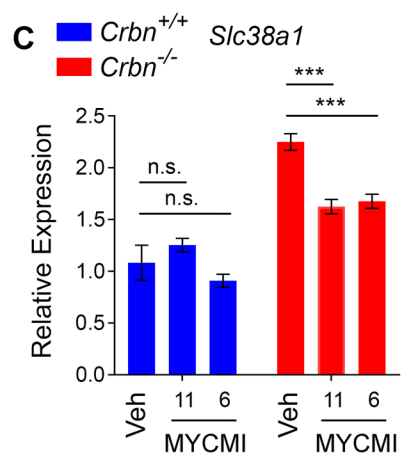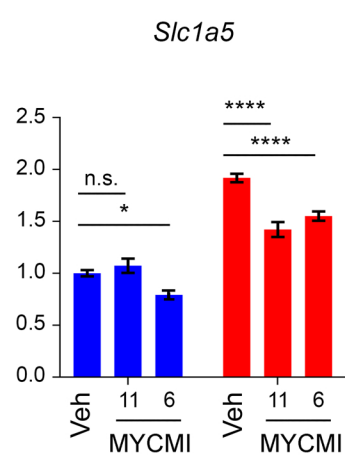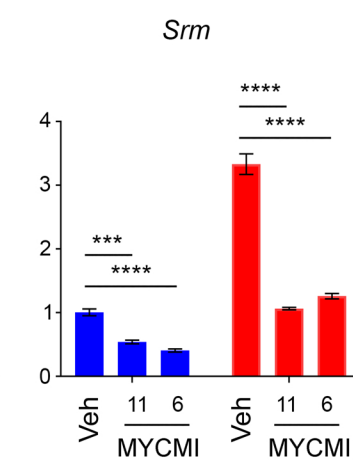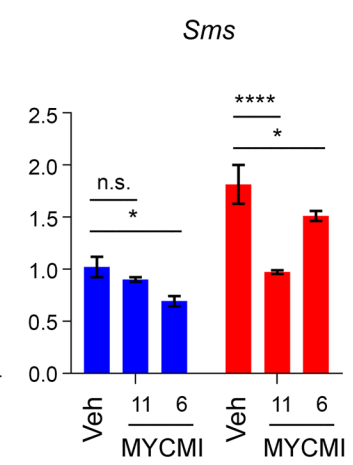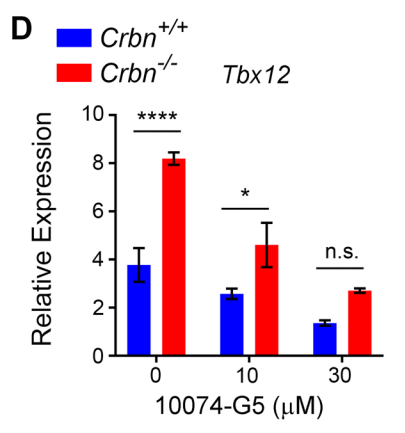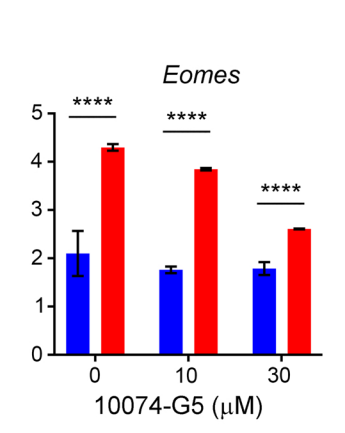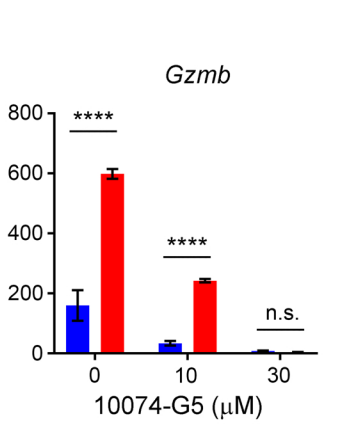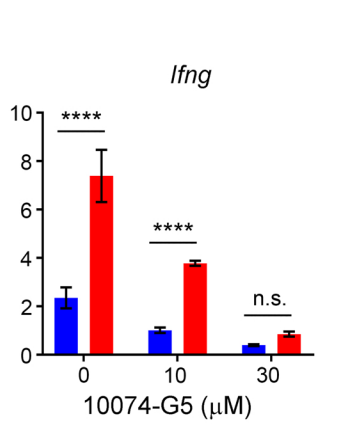

# Supplemental Figure 5

**A**

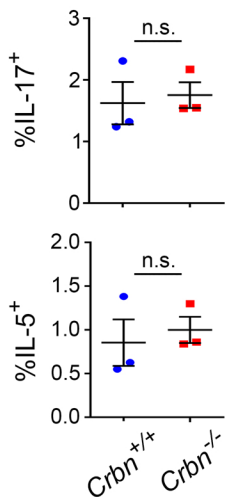

**B**

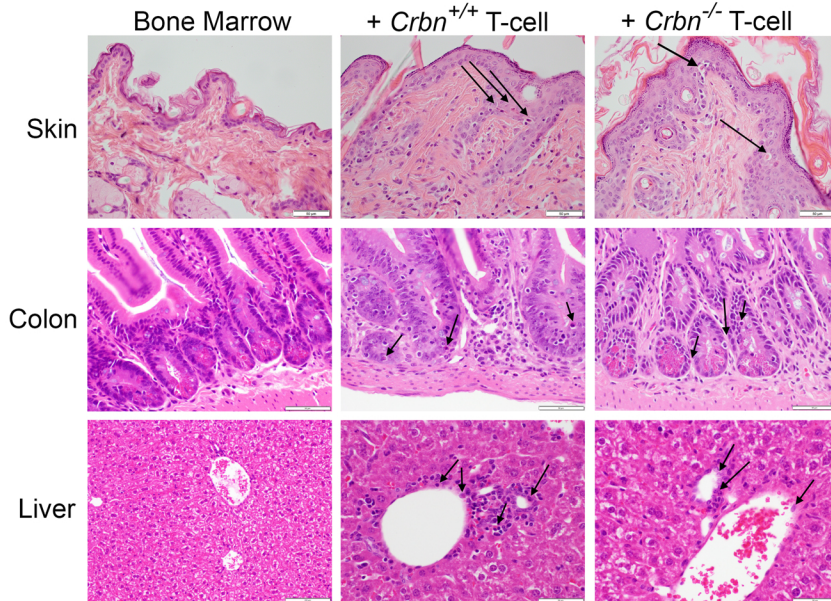

**C**

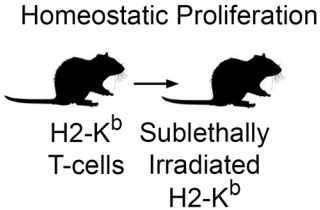

virtual memory

**D**

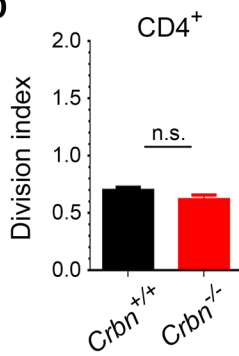

**E**

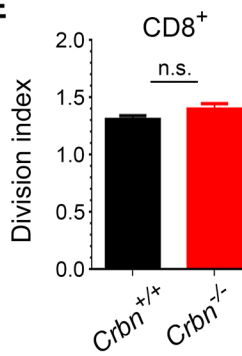

**F**

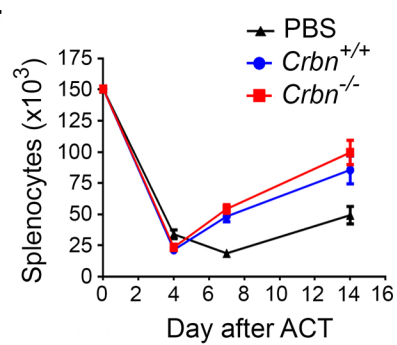

**G**

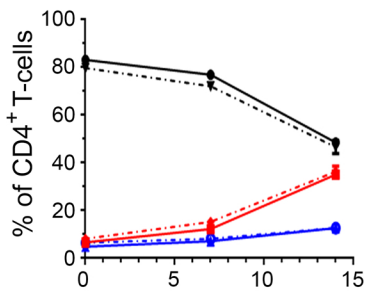

**H**

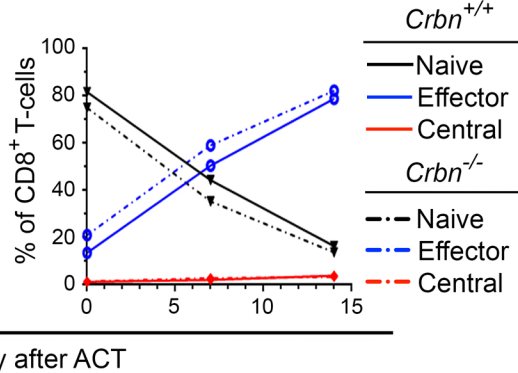

# Supplemental Figure 6

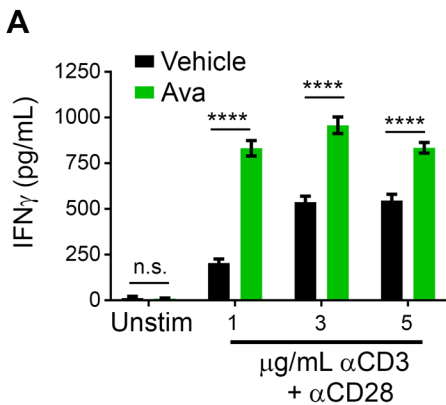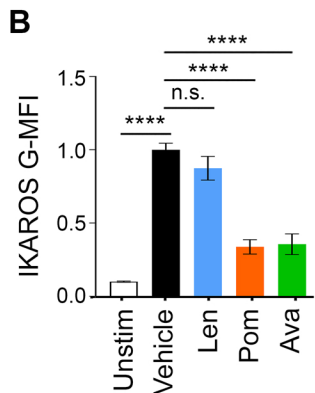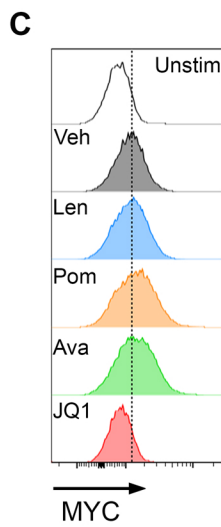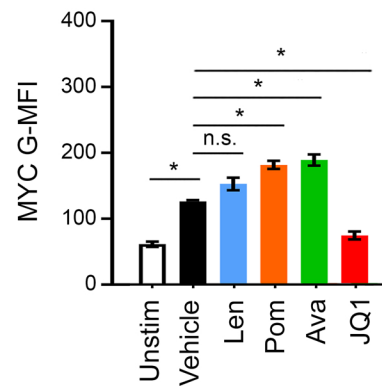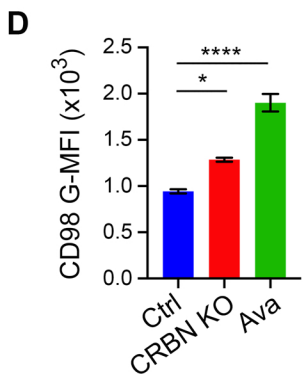

Supplement: bloodBLD2019003257-suppl1.pdf [file bloodBLD2019003257-suppl1.pdf]
